# Supplementary material for: Structural basis and biased signaling of proton sensation by GPCRs mediated by extracellular histidine rearrangement
Source: Research Square preprint supplement (doi:10.21203/rs.3.rs-4306086/v1), 2024-04-29
Supplement: Supplementary file 1 [file e4b1e37a1df49edfaef390eb.docx]

**Supplementary Fig. 1**


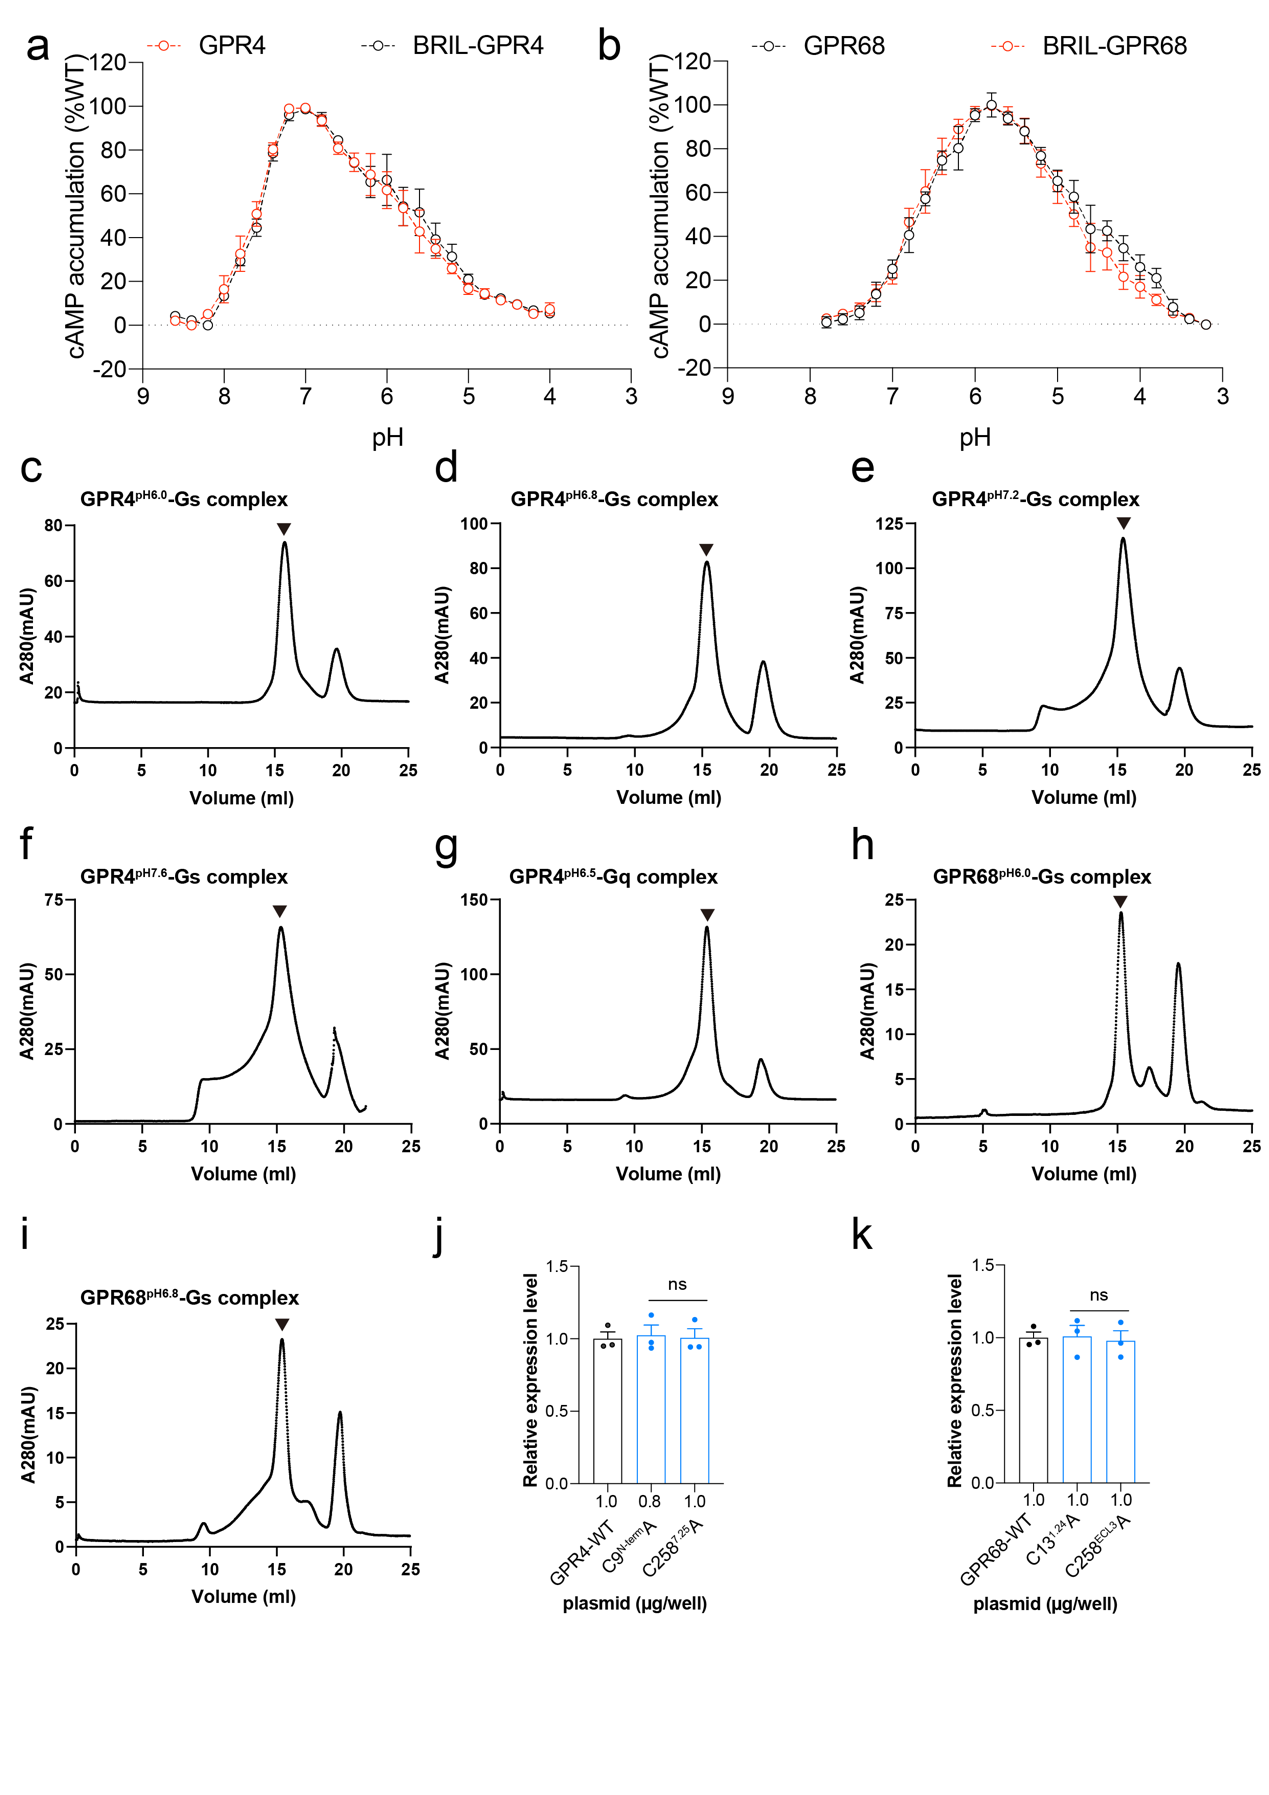


**Supplementary Fig. 1| Representative size-exclusion chromatography elution profiles of** **GPR4–Gs and GPR4–Gq compelx using Superose 6 Increase 10/300 GL.**

**a,** Curves showing pH-dependent cAMP accumulation in cells overexpressing GPR4 or BRIL-GPR4. Values are represented as mean ± SEM of 3 independent experiments (n = 3).

**b,** Curves showing pH-dependent cAMP accumulation in cells overexpressing GPR68 or BRIL-GPR68. Values are represented as mean ± SEM of 3 independent experiments (n = 3).

**c-i,** Representative elution profiles of in vitro reconstituted GPR4pH6.0–Gs complex (c), GPR4pH6.8–Gs complex (d), GPR4pH7.2–Gs complex (e), GPR4pH7.6–Gs complex (f), GPR4pH6.5–Gq complex complex (g), GPR68pH6.0–Gs complex (h), and GPR68pH6.8–Gs complex (i) on Superose 6 Increase 10/300 column. The size-exclusion chromatography peaks are marked by triangles.

**j-k,** Elisa experiments to determine the expression levels of the GPR4 wild type and corresponding mutants (j) and GPR68 wild type and C131.24A or C258ECL3A mutants (k). Values are represented as mean ± SEM of 3 independent experiments (n = 3). n.s., no significance. All data were analyzed by two-sided one-way ANOVA with Turkey test.

**Supplementary Fig. 2**

**
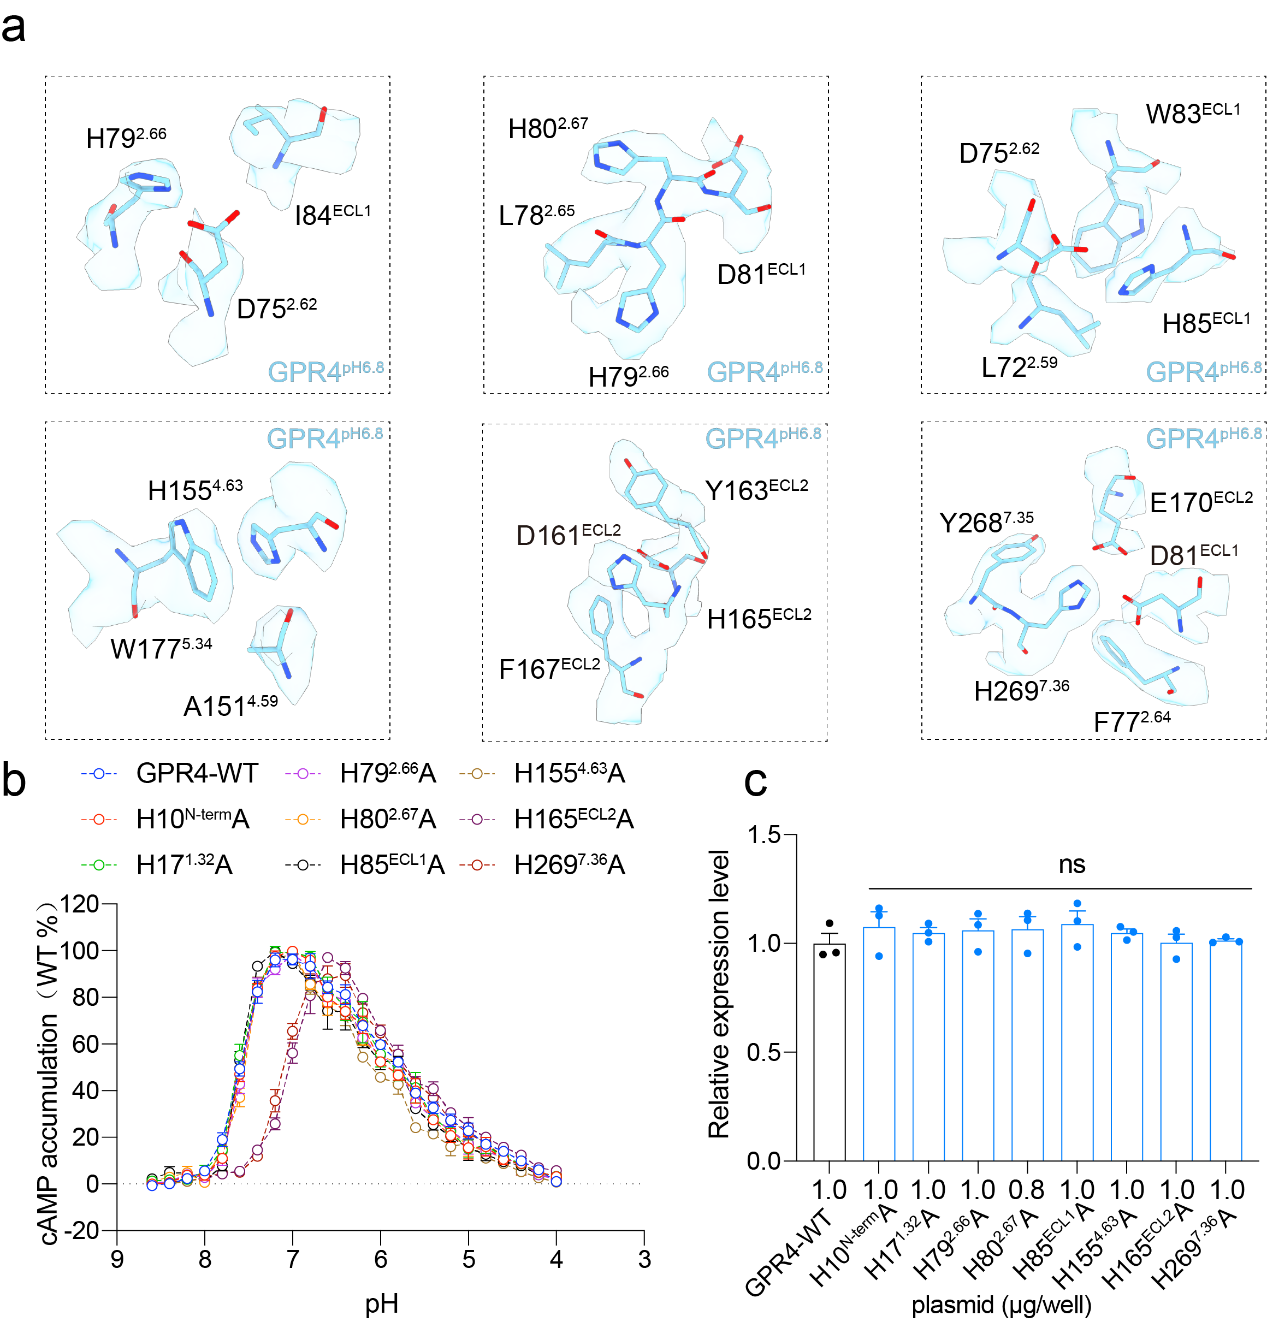
**

**Supplementary Fig. 2| Cryo-EM density of key residues** **contributed to proton sensing in GPR4**

**a**, Cryo-EM density of H792.66, H802.67, H85ECL1, H1554.63, H165ECL2, H2697.36 and surrounding residues including D752.62, I84ECL1, L782.65, D81ECL1, L722.59, W83ECL1, A1514.59, W1775.34, D161ECL2, Y163ECL2, F167ECL2, F772.64, E170ECL2 and Y2687.35 in the structure of GPR4pH6.8-Gs complex. Related to Figure 3d.

**b**, Curves showing pH-dependent cAMP accumulation in cells overexpressing GPR4, H10N-term A, H171.32A, H792.66A, H802.67A, H85ECL1A, H1554.63A, H165ECL2A or H2697.36A. Values are represented as mean ± SEM of 3 independent experiments (n = 3).

**c**, Elisa experiments to determine the expression levels of the wild-type GPR4 and corresponding mutants. Values are mean ± SEM from three independent experiments (n=3). n.s., no significance. All data were analyzed by two-sided one-way ANOVA with Turkey test.

**Supplementary Fig. 3**

**
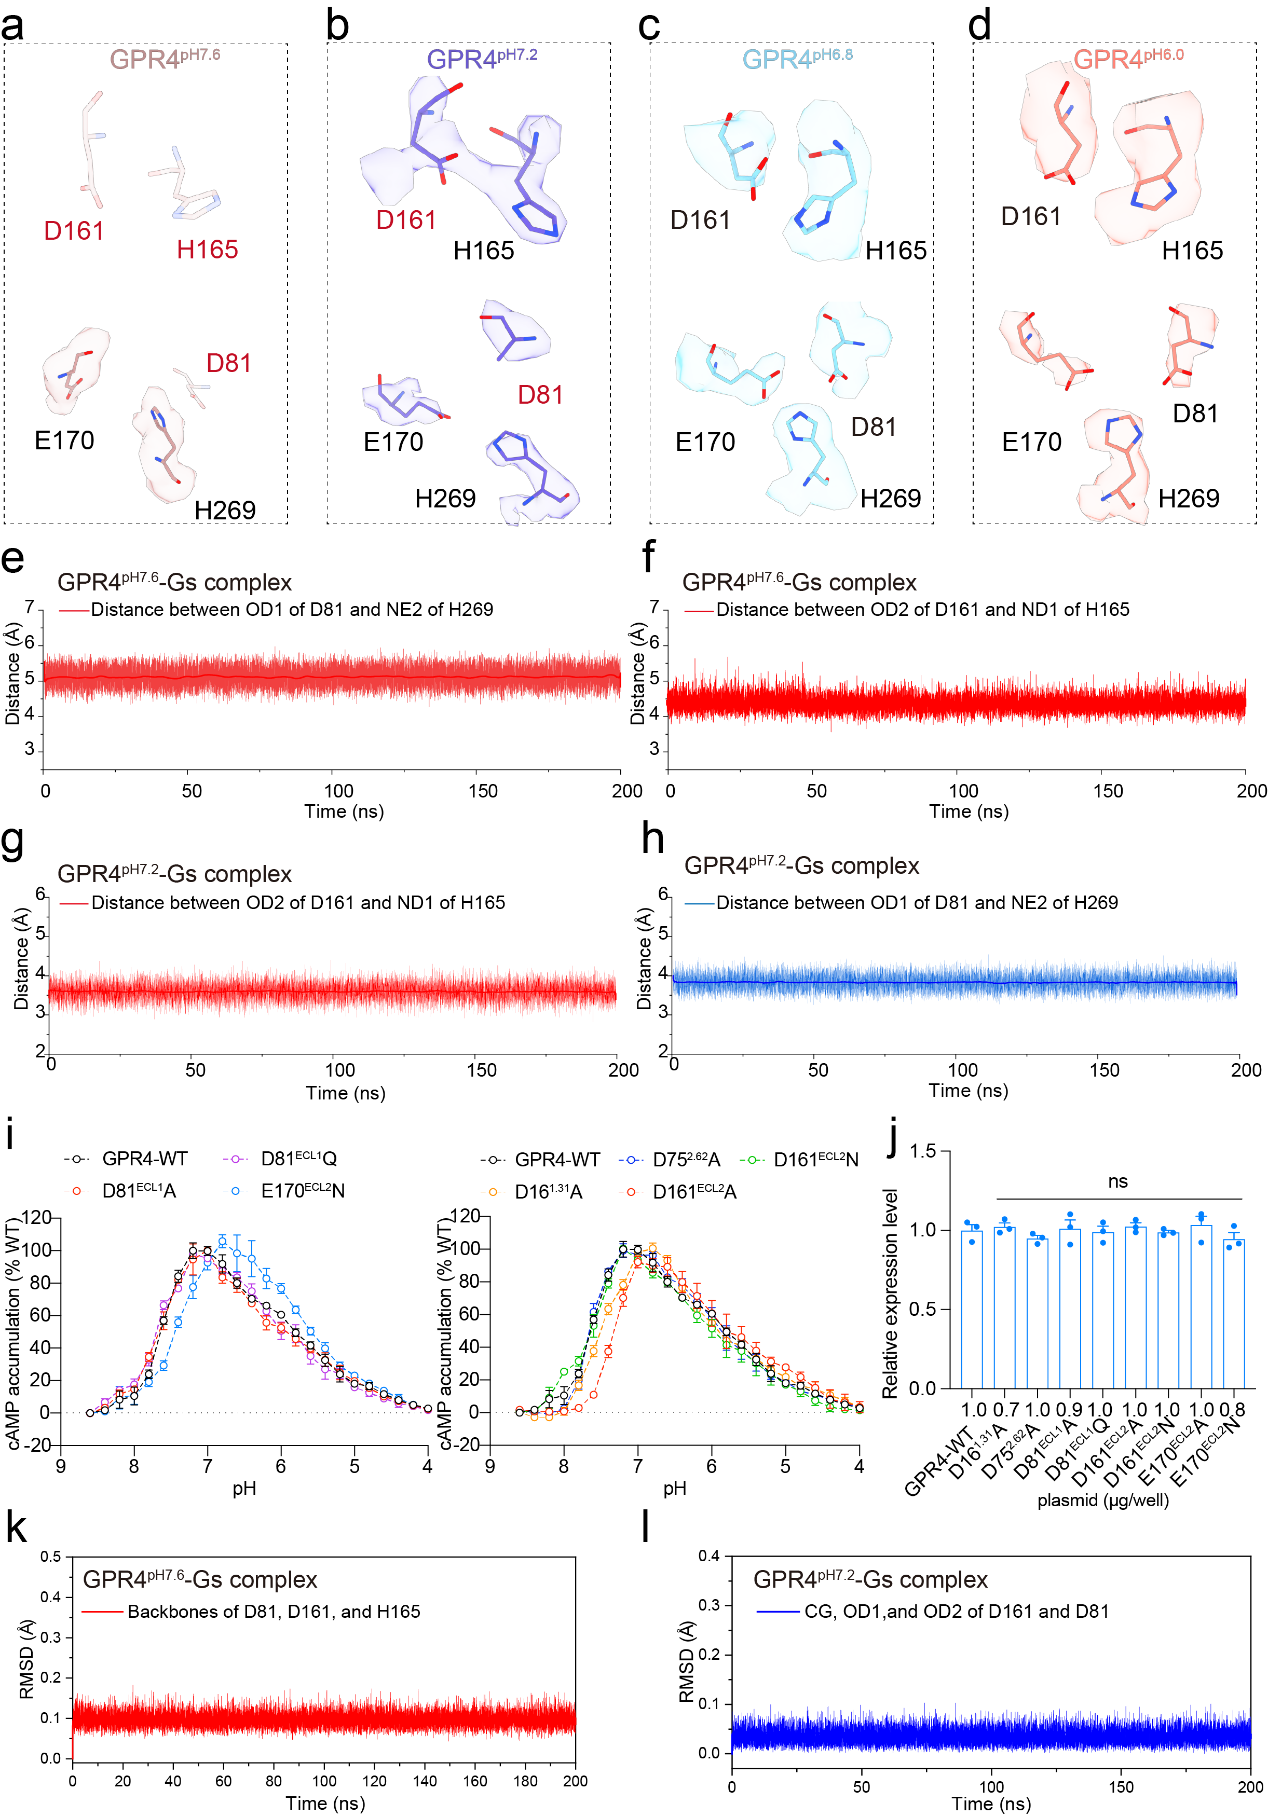
**

**Supplementary Fig. 3| Contribution of the H-bond network to proton sensing by GPR4**

**a-d**, Cryo-EM density of H165ECL2, H2697.36 and surrounding residues including D161ECL2, D81ECL1 and E170ECL2 in the structures of GPR4pH7.6, GPR4pH7.2, GPR4pH6.8 and GPR4pH6.0-Gs.

Due to the poor density of the main chain, the residues marked as transparent have been performed to MD simulation, while other residues marked in red have also been subjected to MD simulations due to poor sidechain density. Related to Figure 4b-e.

**e-f**, The average distances between OD1 of D81, OD2 of D161 and NE2 of H269, as well as ND1 of H165 in the GPR4-Gs complex at pH 7.6 during triplicate 200 ns MD simulations.

**g-h**, The average distances between OD1 of D81, OD2 of D161 and NE2 of H269, as well as ND1 of H165 in the GPR4-Gs complex at pH 7.2 during triplicate 200 ns MD simulations.

**i**, Curves showing pH-dependent cAMP accumulation in cells overexpressing GPR4, D81ECL1A, D81ECL1Q, E170ECL2N (left) or D161.31A, D752.62A, D161ECL2A, D161ECL2N (right). Values are represented as mean ± SEM of 3 independent experiments (n = 3).

**j**, Elisa experiments to determine the expression levels of the wild-type GPR4, D161.31A, D752.62A, D81ECL1A, D81ECL1Q, D161ECL2A, D161ECL2N, E170ECL2A or E170ECL2N mutations. Values are mean ± SEM from three independent experiments (n=3). n.s., no significance. All data were analyzed by two-sided one-way ANOVA with Turkey test.

**k**, The average RMSD values of D81, D161 and H165 in GPR4 pH 7.6-Gs systems during triplicate 200 ns MD simulations.

**l,** The average RMSD values of D81 and D161 in GPR4 pH 7.2-Gs systems during triplicate 200 ns MD simulations.

**Supplementary Fig. 4**

**
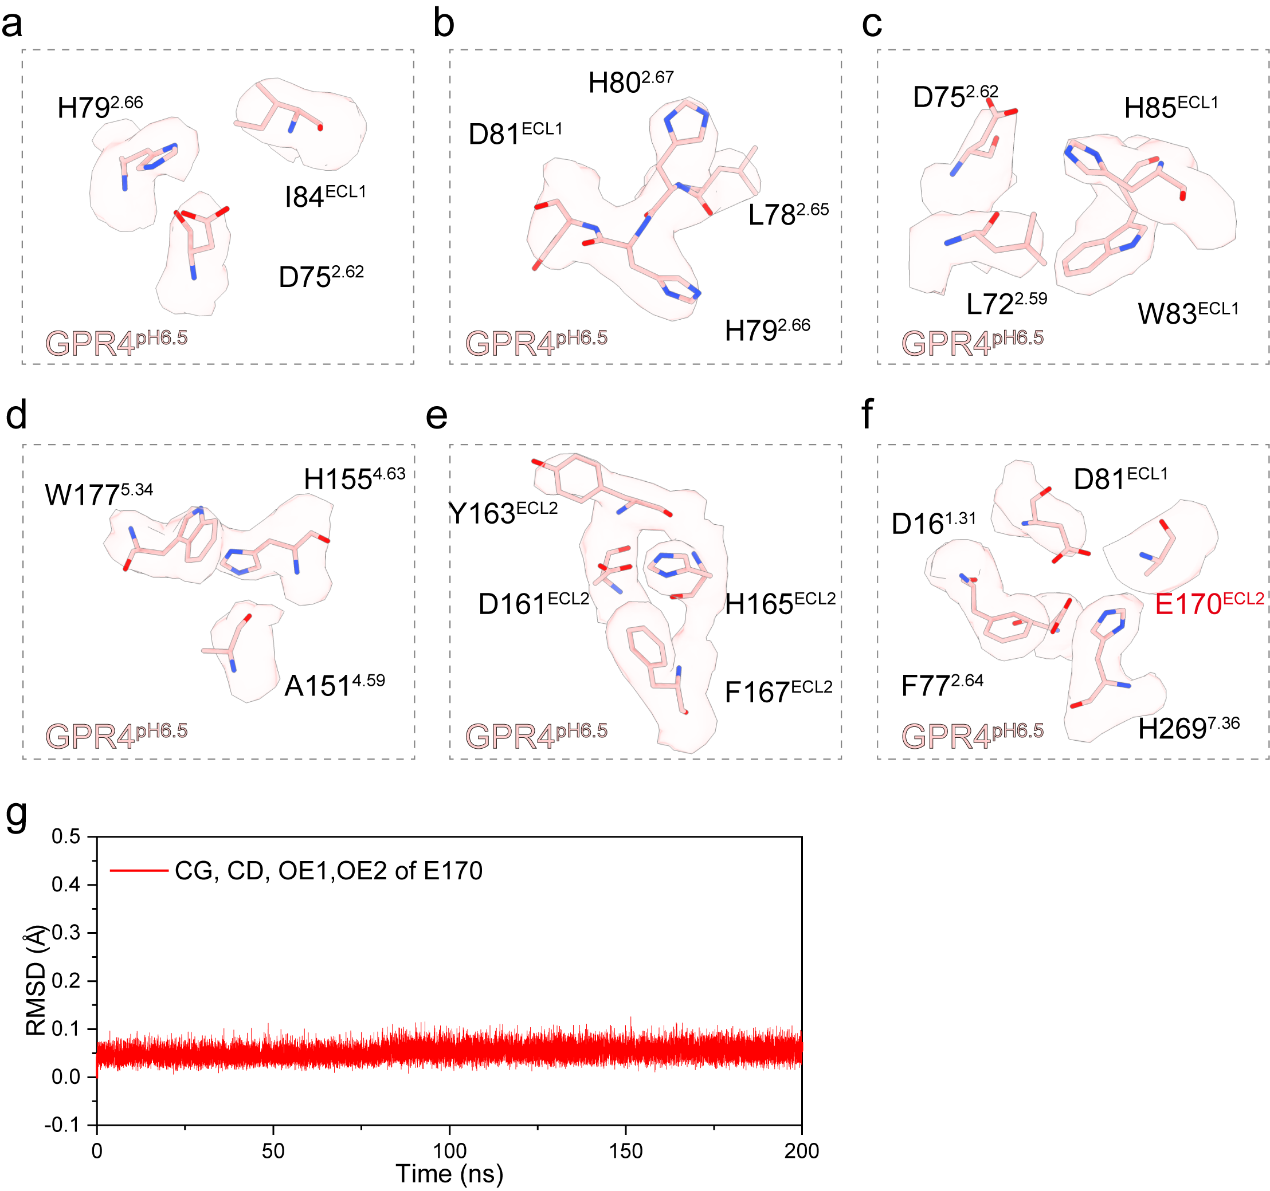
**

**Supplementary Fig. 4| Cryo-EM density of residues of GPR4 contributed to GPR4-Gq activity**

**a-f**, Cryo-EM density of H792.66 (a), H802.67 (b), H85ECL1(c), H1554.63(d), H165ECL2 (e), H2697.36 (f) and surrounding residues in the structure of GPR4pH6.5-Gq complex. Related to Figure 5f.

**g,** The average RMSD values of CG, OE1, OE2 of E170 residue in GPR4pH6.5-Gq systems during triplicate 200 ns MD simulations.

**Supplementary Fig. 5**

**
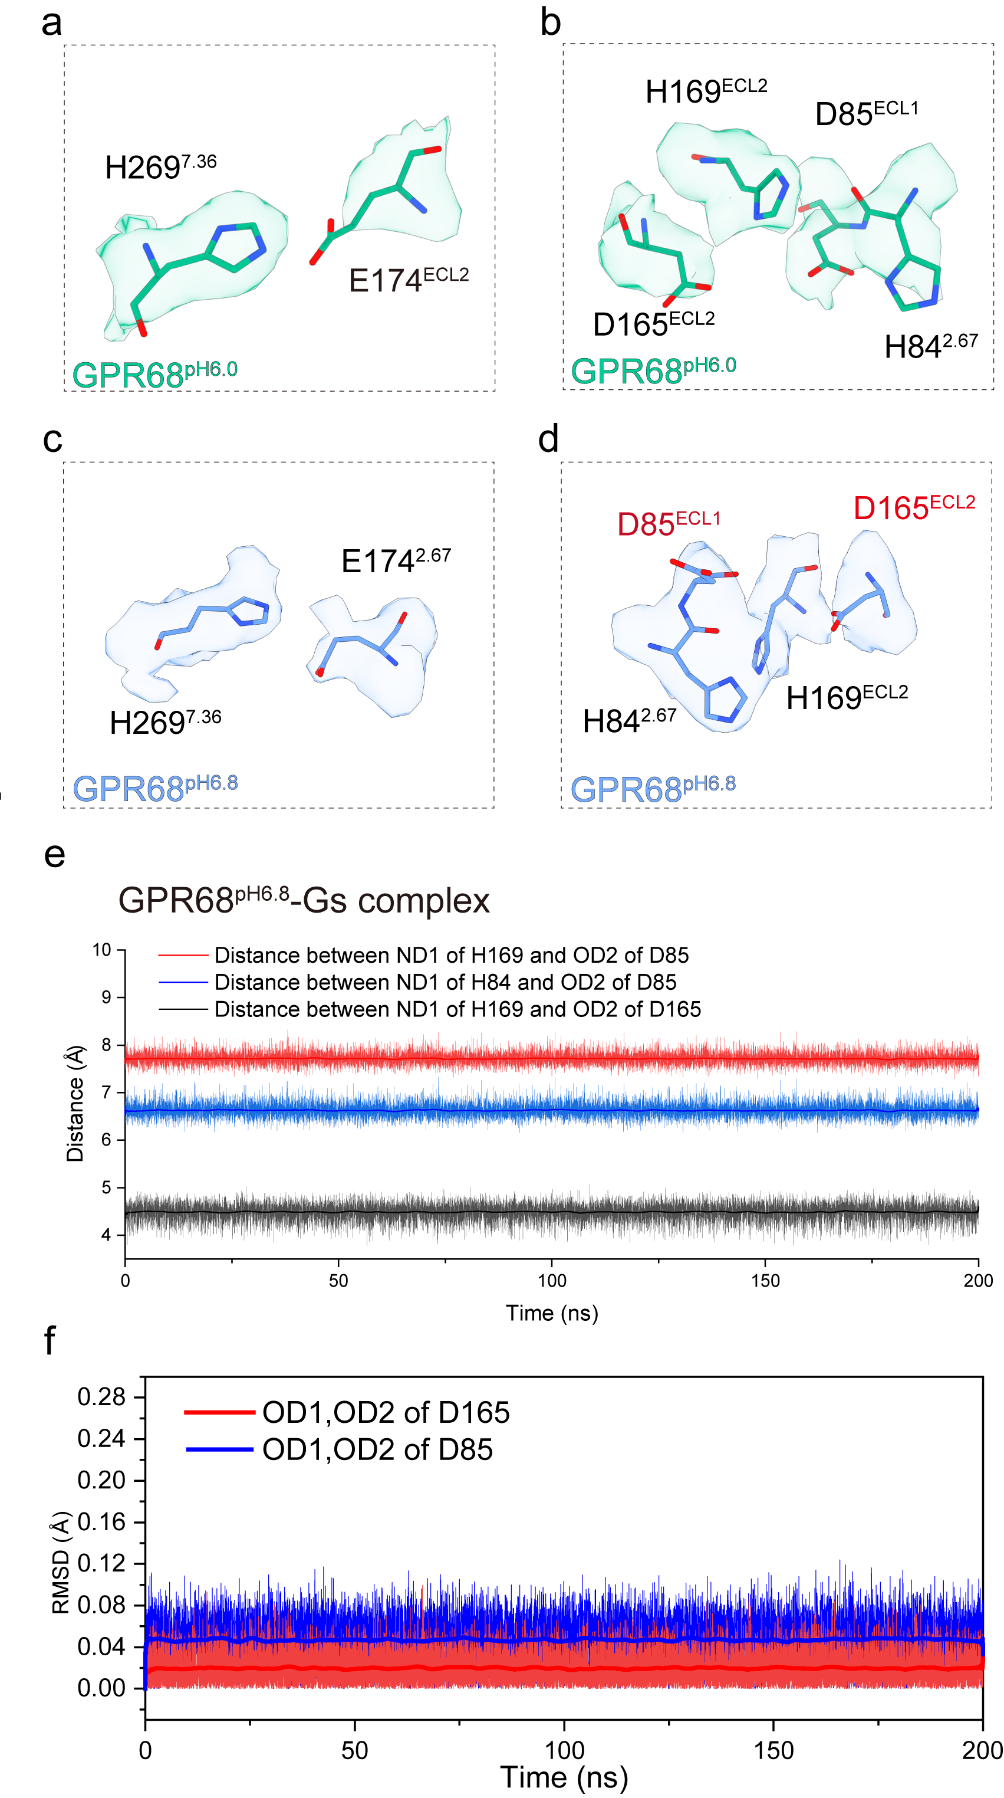
**

**Supplementary Fig. 5|Cryo-EM density of residues in GPR68 contributed to proton sensing**

**a-b**, Cryo-EM density of H2697.36 and surrounding residues including E174ECL2 (a), H843.67, H169 ECL2 and surrounding residues including D85ECL1 and D165ECL2 (b) in the structure of GPR68pH6.0-Gs. The residues marked in red was performed MD simulation due to poor EM density. Related to Figure 7d.

**c-d**, Cryo-EM density of H2697.36 and surrounding residues including E174ECL2 (c), H843.67, H169 ECL2 and surrounding residues including D85ECL1 and D165ECL2 (d) in the structure of GPR68pH6.8-Gs. Related to Figure 7d.

**e**, The average distances between OD1 of D85, OD1 of D165 and ND1 of H84, as well as ND1 of H169 in the GPR68 pH6.8-Gs complex during triplicate 200 ns MD simulations.

**f**, The average RMSD values of OD1, OD2 in D85, OD1, OD2 in D165 residues GPR68pH6.8-Gs systems during triplicate 200 ns MD simulations.

**Supplementary Fig. 6**

**
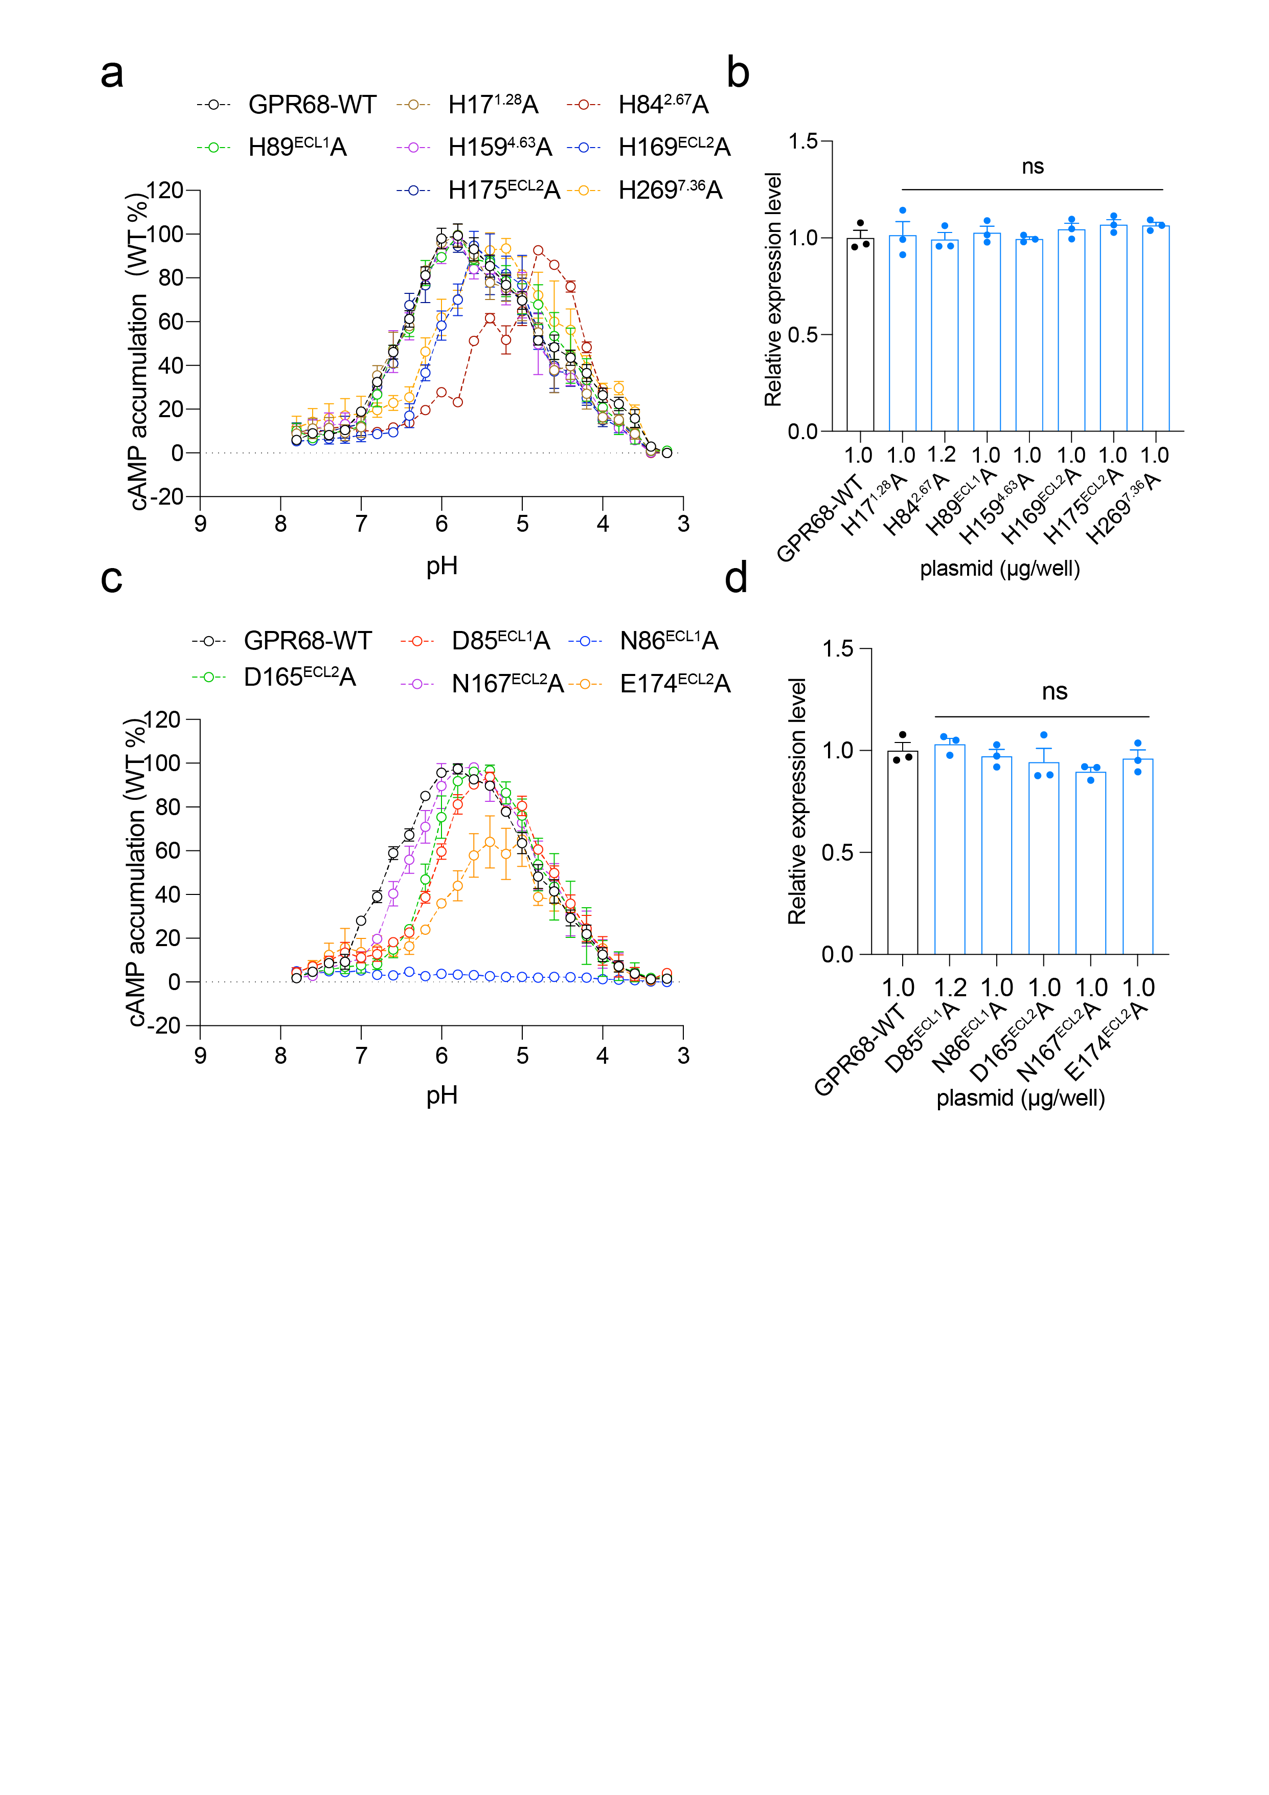
**

**Supplementary Fig. 6 |** **Effects of key residues contributed to proton sensing in GPR68**

**a**, Curves showing pH-dependent cAMP accumulation in cells overexpressing GPR68, H171.28A, H842.67A, H89ECL1A, H1594.63A, H169ECL2A, H175ECL2A or H2697.36A. Values are represented as mean ± SEM of 3 independent experiments (n = 3).

**b**, Elisa experiments to determine the expression levels of the wild-type GPR68, H171.28A, H842.67A, H89ECL1A, H1594.63A, H169ECL2A, H175ECL2A or H2697.36A mutations. Values are mean ± SEM from three independent experiments (n=3). n.s., no significance. All data were analyzed by two-sided one-way ANOVA with Turkey test.

**c**, Curves showing pH-dependent cAMP accumulation in cells overexpressing GPR68, D85ECL1A, N86ECL1A, D165ECL2A, N167ECL2A or E174ECL2A. Values are represented as mean ± SEM of 3 independent experiments (n = 3).

**d**, Elisa experiments to determine the expression levels of the wild-type GPR68, D85ECL1A, N86ECL1A, D165ECL2A, N167ECL2A or E174ECL2A mutations. Values are mean ± SEM from three independent experiments (n=3). n.s., no significance. All data were analyzed by two-sided one-way ANOVA with Turkey test.

**Supplementary Fig. 7**

**
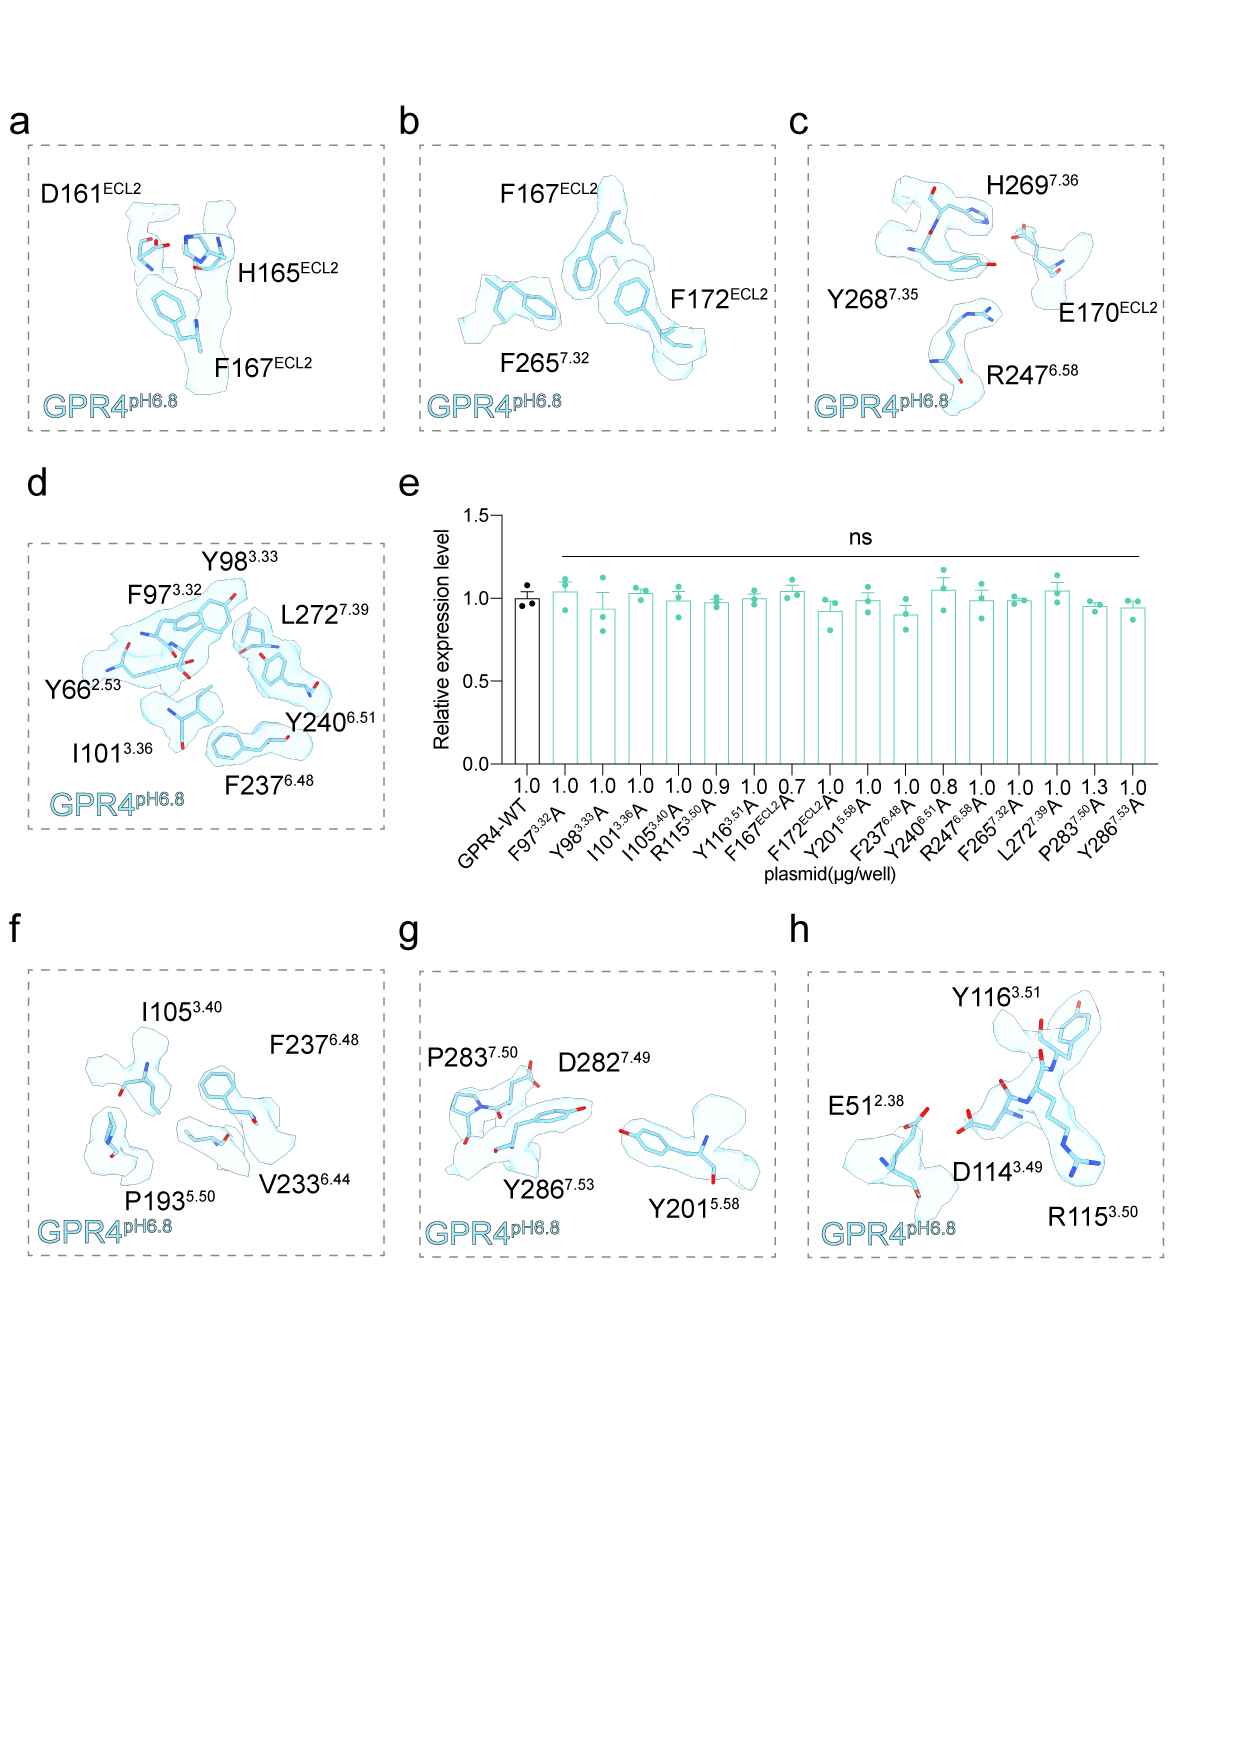
**

**Supplementary Fig. 7|** **Cryo-EM density of residues in the activation propagation pathway of GPR4.**

**a-d**, Cryo-EM density of key residues along the propagation path including Y662.53, Y973.32, Y983.33, I1013.36, D161ECL2, H165ECL2, F167ECL2, E170ECL2, F172ECL2, P1935.50, V2336.44, F2376.48, Y2406.51, R2476.58, F265ECL2, Y2687.35, H2697.36 and L2727.39 in the structure of GPR4pH6.8-Gs complex, Related to Figure 8a-d.

**e**, Elisa experiments to determine the expression levels of the wild type and key residues mutations in the activation propagation pathway of GPR4. Values are mean ± SEM from three independent experiments (n=3). n.s., no significance. All data were analyzed by two-sided one-way ANOVA with Turkey test.

**f-h**, Cryo-EM density of of the V/IPF (F), DPxxY (G) and DRY (H) motifs including E512.38, I1053.40, P1935.50, V2336.44, D1143.49, R1153.50, Y1163.51, Y2015.58, F2376.48, P2837.50 and Y2867.53 in the structure of GPR4pH6.8-Gs complex, Related to Figure 8f-h.

**Supplementary Fig. 8**

**
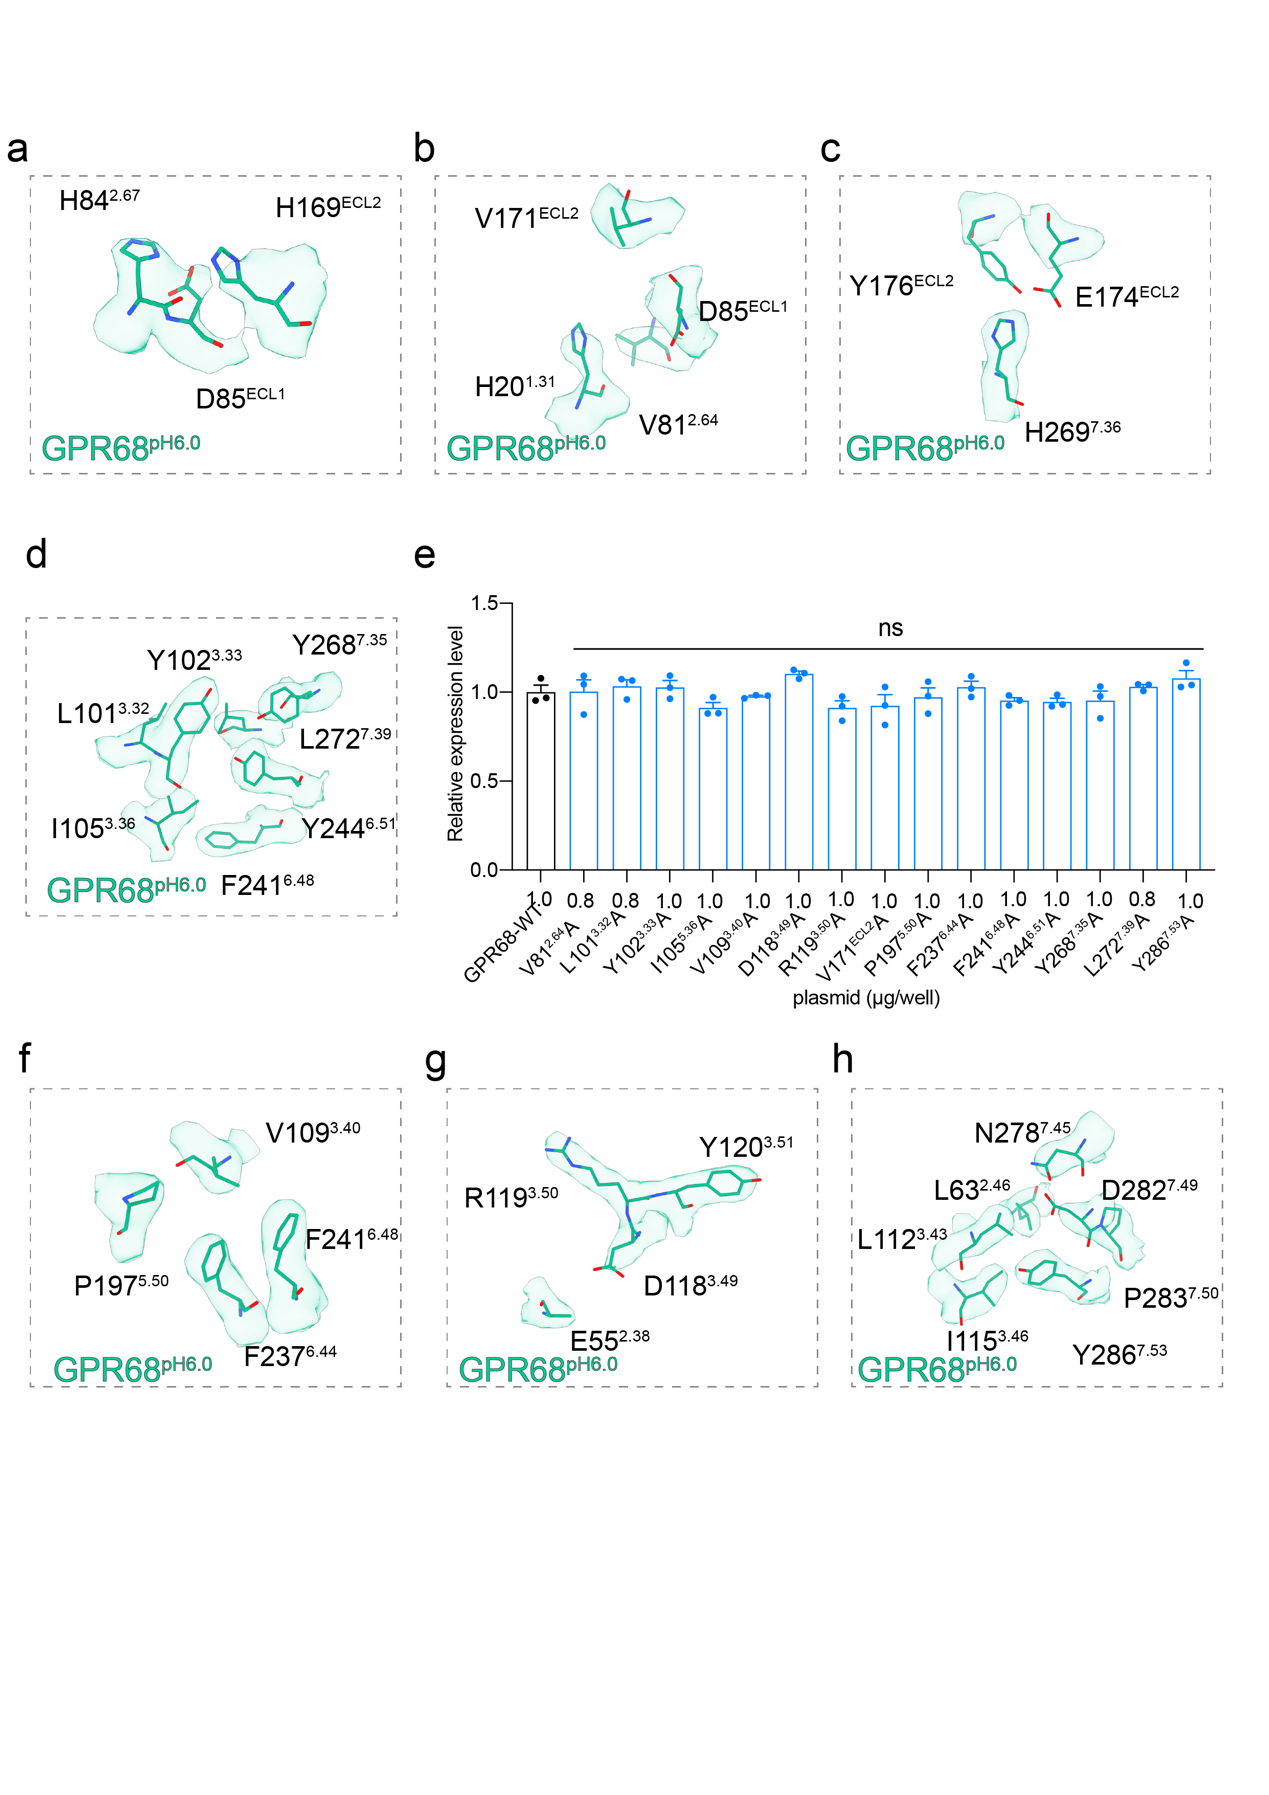
**

**Supplementary Fig. 8|** **Cryo-EM density of residues i****n the activation propagation pathway of GPR68.**

**a-d**. Cryo-EM density of key residues along the propagation path including H201.31, V812.64, H842.67, D85ECL1, L1013.32, Y1023.33, I1053.36, H169ECL2, V171ECL2, E174ECL2, Y176ECL2, F2416.48, Y2446.51, Y2687.35, H2697.36 and L2727.39, in the structure of GPR68pH6.0-Gs complex, Related to Figure 9a-d.

**e**. Elisa experiments to determine the expression levels of the wild type and key residues mutations in the activation propagation pathway of GPR68. Values are mean ± SEM from three independent experiments (n=3). n.s., no significance. All data were analyzed by two-sided one-way ANOVA with Turkey test.

**f-h**. Cryo-EM density of of the V/IPF (F), DPxxY (G) and DRY (H) motifs including E552.38， L632.46, V1093.40, L1123.43, I1153.46, D1183.49, R1193.50, Y1203.51, P1975.50, Y2376.44, F2416.48, N2787.45, D2827.49, P2837.50, Y2867.53, in the structure of GPR68pH6.0-Gs complex.

**Supplementary Fig. 9**

**
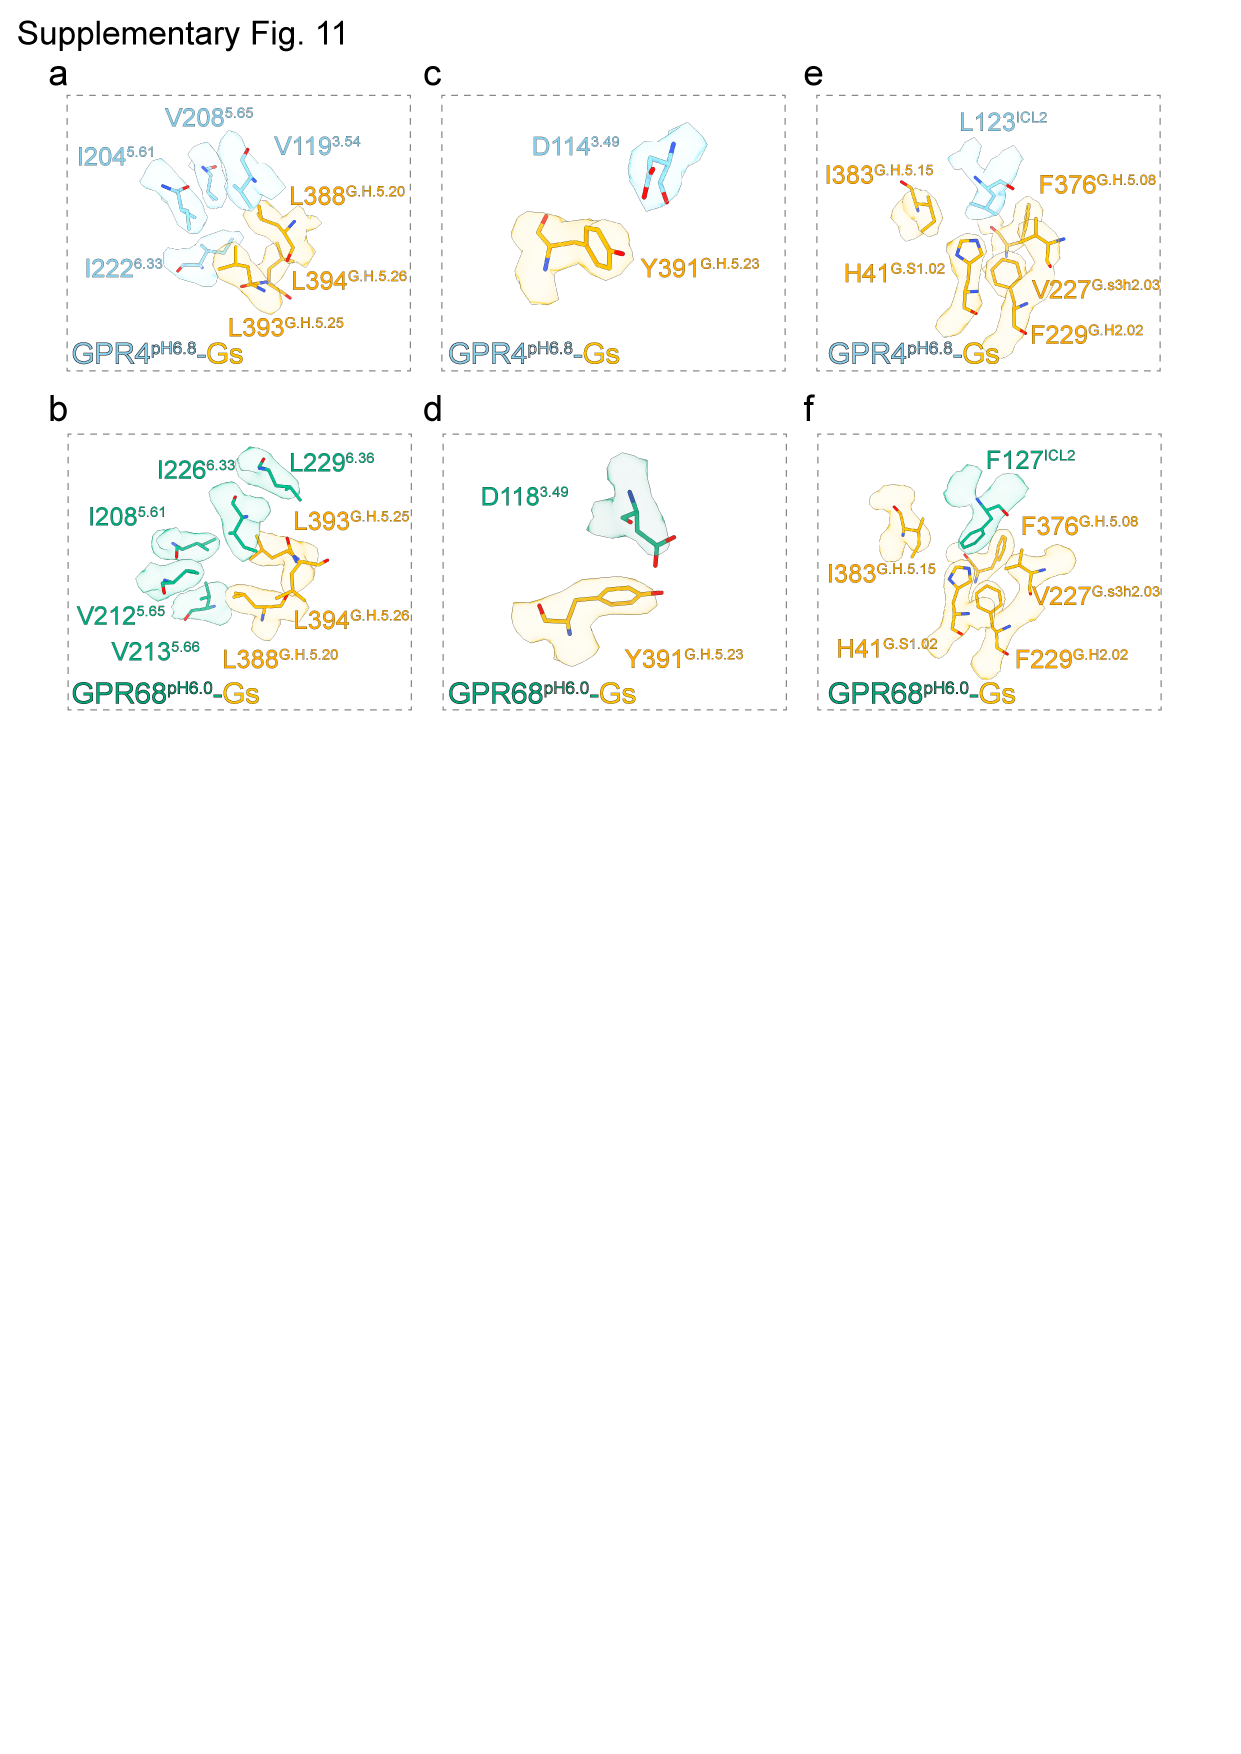
**

**Supplementary Fig. 9| Cryo-EM density of residues in GPR4/GPR68-Gs binding interface**

**a-b**, Cryo-EM density of key residues about the detailed interactions of V1193.54, I2045.61, V2085.65 and I2226.33 in GPR4 pH6.8 with L388G.H5.20, L394G.H5.26 and L393G.H5.25 in Gαs and superimposition of these interactions with those of V1233.54, I2085.61, V2125.65 and L2296.36 in GPR68 pH6.0 and L388G.H5.20, L394G.H5.26 and L393G.H5.25 in Gαs, Related to Figure 10 e.

**c-d**, Cryo-EM density of key residues about detailed interactions between D1143.49 of GPR4 pH6.8 and Y391G.H.5.23 of the α5 helix in Gαs compared to those between D1183.49 of GPR68pH6.0 and Y391G.H.5.23 of Gαs, Related to Figure 10 f.

**e-f**, Cryo-EM density of key residues about the detailed interactions of L123ICL2 in GPR4 pH6.8, and H41G.S1.02, V227G.S3.01, F376G.H5.15 and I383G.H5.15 in Gαs, and superimposition of these interactions with those of F127ICL2 in GPR68pH6.0, and H41G.S1.02, V227G.S3.01, F376G.H5.15 and I383G.H5.15 in Gαs, Related to Figure 10 g.

**Supplementary Fig. 10**

**
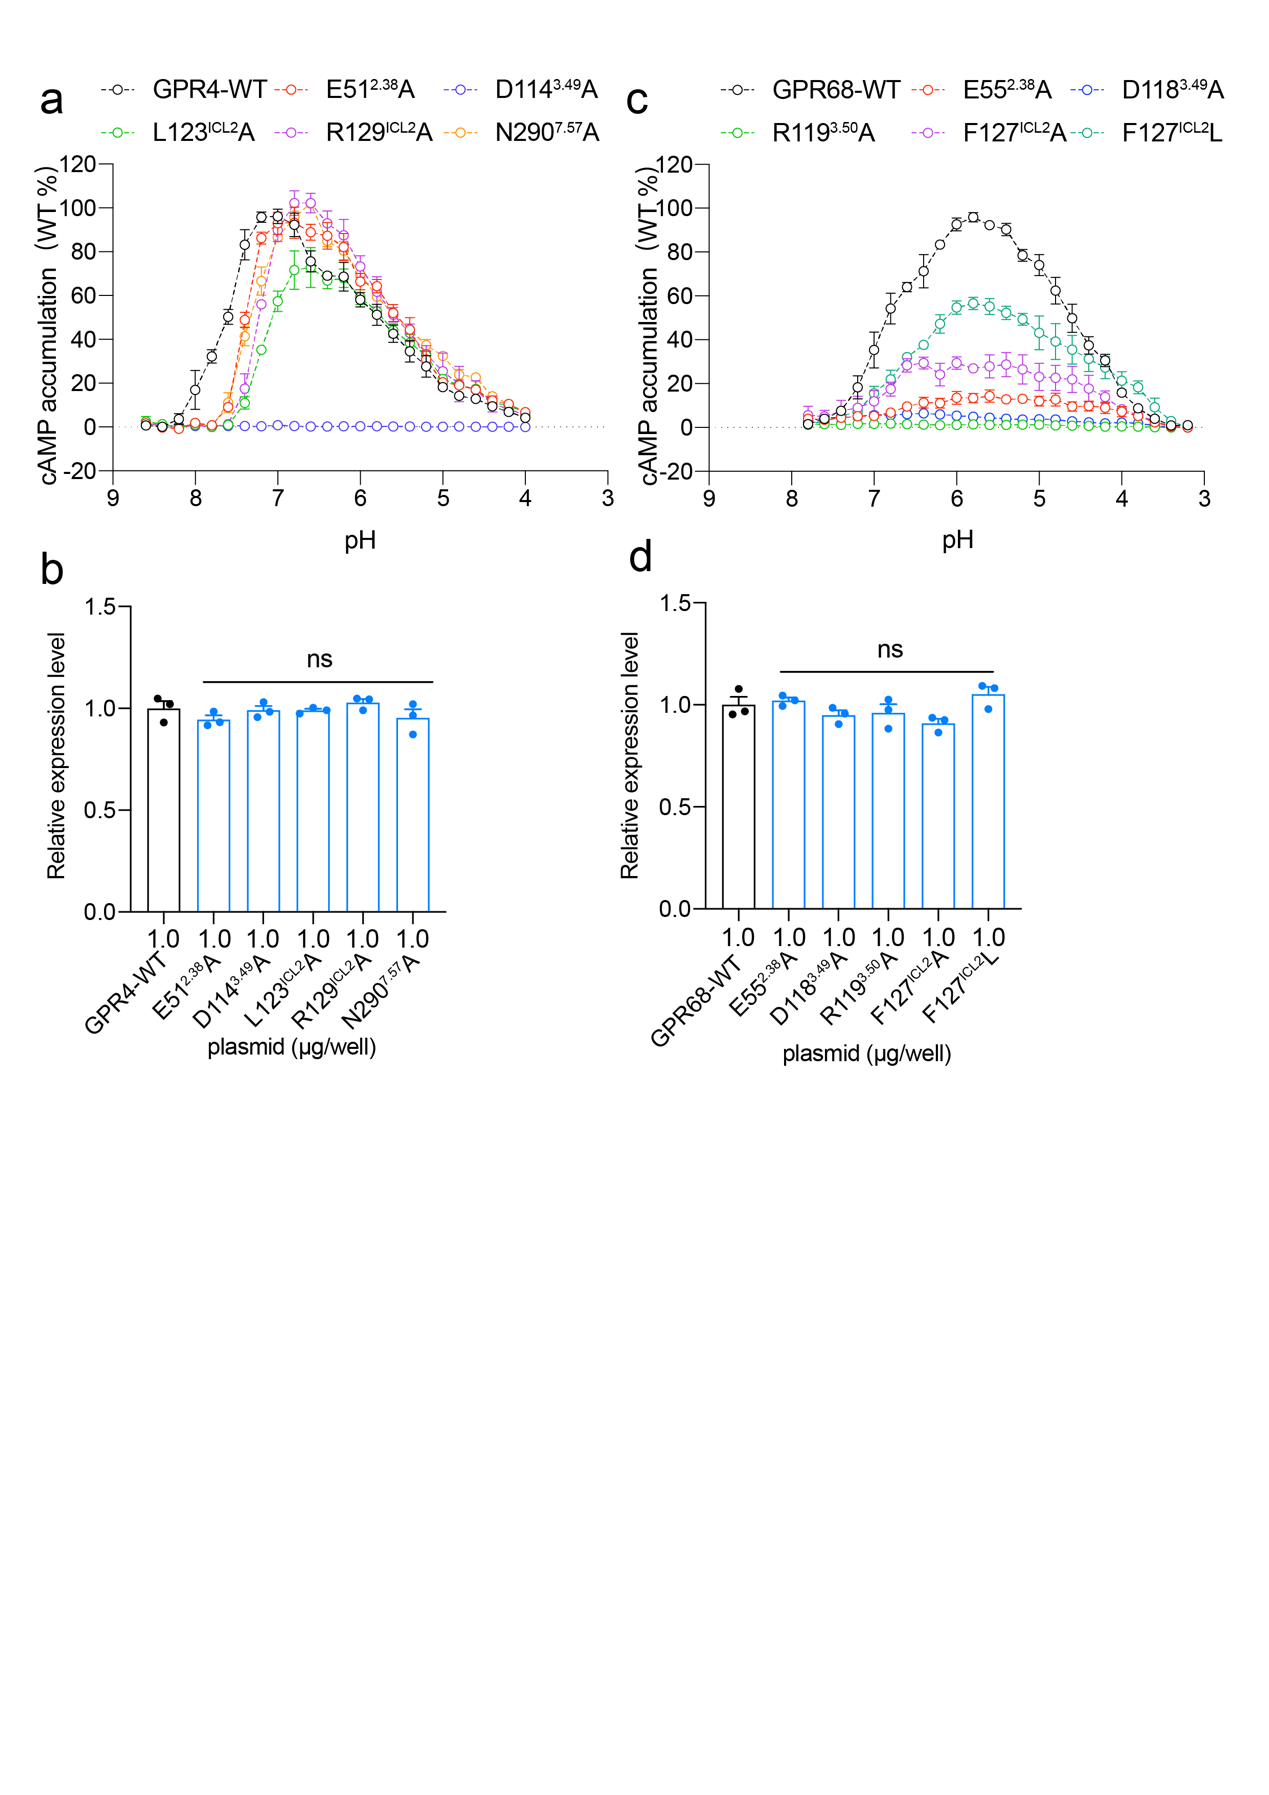
**

**Supplementary Fig. 10|** **Effects of key residue mutations in the activation propagation pathway of GPR4 or GPR68 induced cAMP accumulation**

**a**, Curves showing pH-dependent cAMP accumulation in cells overexpressing GPR4, E512.38A, D1143.49A, L123ICL2A, R129ICL2A or N2907.57A. Values are represented as mean ± SEM of 3 independent experiments (n = 3).

**b**, Elisa experiments to determine the expression levels of the wild-type GPR4, E512.38A, D1143.49A, L123ICL2A, R129ICL2A or N2907.57A. Values are mean ± SEM from three independent experiments (n=3). n.s., no significance. All data were analyzed by two-sided one-way ANOVA with Turkey test.

**c**, Curves showing pH-dependent cAMP accumulation in cells overexpressing GPR68, E552.38A, D1183.49A, R1193.50A, F127ICL2A or F127ICL2L. Values are represented as mean ± SEM of 3 independent experiments (n = 3).

**d**, Elisa experiments to determine the expression levels of the wild-type GPR68, E552.38A, D1183.49A, R1193.50A, F127ICL2A or F127ICL2L. Values are mean ± SEM from three independent experiments (n=3). n.s., no significance. All data were analyzed by two-sided one-way ANOVA with Turkey test.

**Supplementary Table 1:** **The mask of the receptor region for improved EM density.**

| **Model** | **Full map** | **Mask map** | **Improvement** | |
| --- | --- | --- | --- | --- |
| **TM** | **ECL** |
| GPR4pH7.2 receptor in GPR4pH7.2-Gs complex | GPR4pH7.2_Gs_full_map | GPR4pH7.2_receptor_mask_map | No improvement | F159-F167 |
| GPR4pH6.8 receptor in GPR4pH6.8-Gs complex | GPR4pH6.8_Gs_full_map | GPR4pH6.8_receptor_mask_map | D121.27-L181.32  R2166.27-K2216.32 | D156-F159  R162-N164  K171-E175 |
| GPR4pH6.0 receptor in GPR4pH6.0-Gs complex | GPR4pH6.0_Gs_full_map | GPR4pH6.0_receptor_mask_map | No improvement | H80-N82  D161-H165  R254-R263 |
| GPR4pH6.5 receptor in GPR4pH6.5-Gq complex | GPR4pH6.5_Gq_full_map | GPR4pH6.5_receptor_mask_map | L181.32-I251.40  K913.26 | No improvement |
| GPR68pH6.8 receptor in GPR68pH6.8-Gs complex | GPR68pH6.8_Gs_full_map | GPR68pH6.8_receptor_mask_map | No improvement | D161-H165 |
| GPR68pH6.0 receptor in GPR68pH6.0-Gs complex | GPR68pH6.0_Gs_full_map | GPR68pH6.0_receptor_mask_map | H171.28- P251.36  L742.57-Q792.62  R1835.33-L1915.44  N2667.33 | H89  V162-I163  Y176-Q179  W254 |

**Supplementary Table 2: The summary of all models and maps.**

| **Model** | **Map** | **Contour Level** | **Residue** | **Description** |
| --- | --- | --- | --- | --- |
| Item2_GPR4pH7.6 _Gs_full-model | Item1_GPR4pH7.6_Gs_full_map | 0.62 rmsd | **Receptor:** V15-H80, I84-F154, E170-G153, E262-L304;  **Gαs:** T4-M18, I26-V65, V212-L394;  **Gβ1:** E3-N340;  **Gγ2:** Q11-R62;  **scFv16:** V2-A121, S135-V147, P151-E246. | In the section of “Cryo-EM analysis of GPR4 and GPR68 complexes”, used for structural descriptions for GPR4pH7.6-Gs complex. (Fig. 1f) |
| Item4_GPR4pH7.6_receptor_mask_model | Item3_GPR4pH7.6_receptor_mask_map | 4.89 rmsd | **Receptor:** V15-H80, I84-F154, E170-G153, E262-L304. | In the section of“Contribution of the H-bond network to proton sensing by GPR4” (Fig. 4b and Fig. 4f) |
| Item6_GPR4pH7.2 _Gs_full-model | Item5_GPR4pH7.2_Gs_full_map | 3.85 rmsd | **Receptor:** G8-M174, G176-L252, R254-L304;  **Gαs:** T4-M18, I26-V65, V212-L394;  **Gβ1:** E3-N340;  **Gγ2:** Q11-R62;  **scFv16:** V2-A121, S135-E246. | 1. In the section of “Cryo-EM analysis of GPR4 and GPR68 complexes”, used for structural descriptions for GPR4pH7.2-Gs complex. (Fig. 1f). 2. In the section of“Coupling of GPR4 and GPR68 with Gs”. (Fig. 10d). |
| Item8_GPR4pH7.2_receptor_mask_model | Item7_GPR4pH7.2_receptor_mask_map | 7.24 rmsd | **Receptor:** G8- M174, G176-L252, R254-L304. | In the section of “Contribution of the H-bond network to proton sensing by GPR4” (Fig. 4c and Fig. 4f) |
| Item10_GPR4pH6.8 _Gs_full-model | Item9_GPR4pH6.8_Gs_full_map | 1.26 rmsd | **Receptor:** G8-D161, H165-L304;  **Gαs:** T4-M18, I26-V65, V212-L394;  **Gβ1:** E3-N340;  **Gγ2:** Q11-R62;  **scFv16:** V2-A121, S135-V147, P151-E246. | 1. In the section of “Cryo-EM analysis of GPR4 and GPR68 complexes”, used for structural descriptions for GPR4pH6.8-Gs complex. (Fig. 1f) 2. In the section of“Coupling of GPR4 and GPR68 with Gs”. (Fig. 10a, Fig. 10c-g) |
| Item12_GPR4pH6.8_receptor_mask_model | Item11_GPR4pH6.8_receptor_mask_map | 2.35 rmsd | **Receptor:** G8-L304. | 1. In the section of “Key histidine residues for GPR4-Gs coupling in response to proton sensation”. (Fig. 3a and Fig. 3d) 2. In the section of“Contribution of the H-bond network to proton sensing by GPR4” (Fig. 4d and Fig. 4f) 3. In the section of “Common proton sensing mechanisms shared by GPR68 and GPR4”. (Fig. 6a and Fig. 7d) 4. In the section of “Activation mechanisms of GPR4” (Fig .8) |
| Item14_GPR4pH6.0 _Gs_full-model | Item13_GPR4pH6.0_Gs_full_map | 0.42 rmsd | **Receptor:** G8- L304;  **Gαs:** T4-M18, I26-R61, K213-L394;  **Gβ1:** Q9-N340;  **Gγ2:** R13-R62;  **scFv16:** V2-A121, S135-E246. | (1) In the section of “Cryo-EM analysis of GPR4 and GPR68 complexes”. (Fig. 1f)  (2) In the section of“Coupling of GPR4 and GPR68 with Gs”. (Fig. 10d) |
| Item16_GPR4pH6.0_receptor_mask_model | Item15_GPR4pH6.0_receptor_mask_map | 2.19 rmsd | **Receptor:** G8- L304; | In the section of“Contribution of the H-bond network to proton sensing by GPR4”. (Fig. 4e and Fig. 4f) |
| Item18_GPR4pH6.5 _Gq_full-model | Item17_GPR4pH6.5_Gq_full_map | 0.72 rmsd | **Receptor:** C9- A300;  **Gαq:** T4-H57, K180-V359;  **Gβ1:** E3-N340;  **Gγ2:** Q11-R62;  **scFv16:** V2-A121, S135-E246. | 1. In the section of “Cryo-EM analysis of GPR4 and GPR68 complexes”. (Fig. 1f) 2. In the section of “Coupling of GPR4 with Gq”. (Fig. 10d) |
| Item20_GPR4pH6.5_receptor_mask_model | Item19_GPR4pH6.5_receptor_mask_map | 1.64 rmsd | **Receptor:** C9- H302. | In the section of“Protonation of specific histidine residue confer GPR4-Gq coupling activity”**.** (Fig. 5 and Fig. 6) |
| Item22_GPR68pH6.8 _Gs_full-model | GPR Item21_68pH6.8_Gs_full_map | 1.36 rmsd | **Receptor:** C13-L297;  **Gαs:** T4-M18, I26-H64, V212-L394;  **Gβ1:** E3-T181, H183-N340;  **Gγ2:** Q11-R62;  **scFv16:** V2-S120, D137-S208, T210-L247. | (1) In the section of “Cryo-EM analysis of GPR4 and GPR68 complexes” (Fig. 1f)  (2) In the section of “Coupling of GPR4 and GPR68 with Gs”. (Fig. 10d) |
| GPR Item24_68pH6.8_receptor_mask_model | Item23_GPR68pH6.8_receptor_mask_map | 7.57 rmsd | **Receptor:** C13-L297. | 1. In the section of “Common proton sensing mechanisms shared by GPR68 and GPR4”. (Fig. 7d-e) 2. In the section of “Proton sensing by H84 of GPR68”. (Fig. 7d-e) |
| Item26_GPR68pH6.0 _Gs_full-model | Item25_GPR68pH6.0_Gs_full_map | 0.89 rmsd | **Receptor:** C13-G217; Q219-A298;  **Gαs:** T4-M18, I26-M60, K213-G304, S306-P326, E330-L394;  **Gβ1:** Q6-A309, H311-N340;  **Gγ2:** Q11-R62;  **scFv16:** V2-S120, S135- L245. | 1. In the section of “Cryo-EM analysis of GPR4 and GPR68 complexes”. (Fig. 1f) 2. In the section of“Coupling of GPR4 and GPR68 with Gs”. (Fig. 10b-d) |
| Item28_GPR68pH6.0_receptor_mask_model | Item27_GPR68pH6.0_receptor_mask_map | 0.57 rmsd | **Receptor:** C13-G217; Q219-A298. | 1. In the section of “Common proton sensing mechanisms shared by GPR68 and GPR4”. (Fig. 7d and Fig. 7e) 2. In the section of “Proton sensing by H84 of GPR68”. (Fig. 7d and Fig. 7e) 3. In the section of “Activation mechanisms of GPR68”. (Fig. 9) |
| Item29_GPR4inactivesimulated_ model | - | - | **Receptor:** M1-H302. | 1. In the section of “Key histidine residues for GPR4-Gs coupling in response to proton sensation”. (Fig. 3) 2. In the section of “Contribution of the H-bond network to proton sensing by GPR4”. (Fig. 4) 3. In the section of “Protonation of specific His residues confer GPR4-Gq coupling activity”. (Fig. 5) 4. In the section of “Common proton sensing mechanisms shared by GPR68 and GPR4” (Fig. 6a-c) 5. In the section of “Activation mechanisms of GPR4” (Fig. 8) |
| Item30_GPR68inactivesimulated_ model | - | - | **Receptor:** M1-A298. | 1. In the section of “Common proton sensing mechanisms shared by GPR68 and GPR4” and Proton sensing by H84 of GPR68 (Fig. 7) 2. In the section of “Activation mechanisms of GPR68” (Fig. 9) |
| Item31_GPR4pH7.6 simulated_ model | - | - | **Receptor:** M1-H302. | (1) In the section of“Contribution of the H-bond network to proton sensing by GPR4”, residues D81, D161 and H165 were performed MD simulation due to poor density (Fig. 4b and Fig. 4f) |
| Item32_GPR4pH7.2 simulated_ model | - | - | **Receptor:** M1-H302. | In the section of“Contribution of the H-bond network to proton sensing by GPR4”, residues D81 and D161 were performed MD simulation due to poor density (Fig. 4c and Fig. 4f) |
| Item33_GPR4pH6.5 simulated_ model | - | - | **Receptor:** M1-H302. | In the section of“Protonation of specific histidine residue confer GPR4-Gq coupling activity”, residue E170 was performed MD simulation due to poor density (Fig. 5 and Fig. 6). |
| Item34_GPR68pH6.8simulated_ model | - | - | **Receptor:** M1-A298. | (1) In the section of “Common proton sensing mechanisms shared by GPR68 and GPR4”, residues D85 and D165 were performed MD simulation due to poor density (Fig. 7d-e)  (2) In the section of “Proton sensing by H84 of GPR68”. (Fig. 7d-e) |

**Supplementary Table 3: Summary of residues were performed MD simulation due to poor density**

| **Structure** | **pH** | **MD** |
| --- | --- | --- |
| GPR4-Gq | pH6.5 | E170: CG, CD, OE1, OE2 |
| GPR4-Gs | pH7.2 | D161: CG, OD1, OD2 |
| D81: CG, OD1, OD2 |
| GPR4-Gs | pH7.6 | D81 |
| D161 |
| H165 |
| GPR68-Gs | pH6.8 | D85: OD1, OD2  D165: OD1, OD2 |

**Supplementary Table 4: Interaction of GPR4 and Gαs in the GPR4pH6.0- Gαs complex.**

| **Interactions** | **GPR4** | **Gαs** | **Distance (Å)** |
| --- | --- | --- | --- |
| Hydrophobic  (≤4.5 Å) | E218 | L394 | 3.9 |
| T214 | 4.0 |
| I222 | 3.6 |
| I222 | L393 | 4.3 |
| L225 | 3.9 |
| R115 | 3.8 |
| I204 | 4.5 |
| V119 | 3.5 |
| L52 | E392 | 3.8 |
| L56 | 4.1 |
| R115 | 4.2 |
| Y286 | 3.5 |
| L225 | 4.4 |
| A293 | 4.5 |
| L52 | Y391 | 3.9 |
| D114 | 4.3 |
| N50 | 3.9 |
| A118 | 3.3 |
| V208 | L388 | 3.3 |
| V119 | 3.2 |
| R129 | H387 | 3.9 |
| P122 | 4.4 |
| V208 | Q384 | 4.0 |
| V119 | 3.7 |
| P122 | 4.2 |
| P122 | I383 | 4.2 |
| L123 | 3.7 |
| P122 | R380 | 3.9 |
| S211 | D381 | 4.5 |
| P122 | R380 | 3.9 |
| L123 | 4.1 |
| V212 | Y360 | 3.4 |
| V212 | V358 | 4.3 |
| S213 | 3.5 |
| L123 | V227 | 3.9 |
| L123 | F376 | 3.3 |
| L123 | H41 | 3.5 |
| R130 | R38 | 4.5 |
| H-Bond (≤3.5 Å) | N290 | E392 | 2.8 |
| Q45 | 3.4 |
| E51 | Y391 | 3.1 |
| R115  (main chain) | 3.4 |
| N50 | Q390 | 3.0 |
| A118  (main chain) | H387 | 3.0 |
| A207 | Q384 | 3.4 |
| S211 | 3.4 |
| S213 | D381 | 3.4 |
| V212  (main chain) | 3.2 |
| A120  (main chain) | R380 | 3.3 |
| R126  (main chain) | R38 | 3.3 |
| R130 | Q35 | 3.4 |
| Polar (≤4.0 Å) | R129  (main chain) | R38 | 3.7 |
| R129  (main chain) | Y391 | 3.9 |
| T214 | R385 | 3.9 |
| S213  (main chain) | 3.6 |
| S211 | Q384 | 3.6 |
| V119  (main chain) | 3.7 |
| S213 | Y360 | 3.7 |
| Charge- charge (≤6 Å) | E218 | R385 | 3.4 |

**Supplementary Table 5: Interaction of GPR4 and Gαs in the GPR4pH6.8- Gαs complex.**

| **Interactions** | **GPR4** | **Gαs** | **Distance (Å)** |
| --- | --- | --- | --- |
| Hydrophobic and Var der Waals  (≤4.5 Å) | I222 | L394 | 4.2 |
| E218 | 4.2 |
| I222 | L393 | 3.7 |
| I204 | 4.2 |
| V119 | 3.7 |
| L225 | 3.8 |
| L52 | E392 | 3.8 |
| L225 | 4.1 |
| L52 | Y391 | 3.6 |
| A118 | 3.4 |
| R129 | 3.9 |
| V208 | L388 | 4.1 |
| V119 | 3.4 |
| I222 | 3.6 |
| T214 | 3.8 |
| P122 | H387 | 4.3 |
| R129 | 3.7 |
| V119 | 4.5 |
| T214 | R385 | 2.9 |
| S211 | Q384 | 3.2 |
| P122 | 4.1 |
| P122 | I383 | 3.9 |
| L123 | 3.7 |
| S211 | D381 | 3.7 |
| S213 | 3.2 |
| V212 | 3.8 |
| P122 | R380 | 3.9 |
| L123 | 3.6 |
| A120 | 4.1 |
| L123 | C379 | 4.2 |
| L123 | F376 | 3.3 |
| V212 | Y360 | 3.9 |
| V212 | Y358 | 4.3 |
| S213 | 3.5 |
| L123 | H41 | 3.6 |
| R130 | R38 | 4.3 |
| R130 | Q35 | 4.0 |
| H-Bond (≤3.5 Å) | Q45 | E392 | 2.6 |
| N290 | 3.2 |
| R115 | 3.5 |
| E51 | Y391 | 3.2 |
| D114 | 3.5 |
| R115 | 3.1 |
| N50 | Q390 | 3.3 |
| A118 | H387 | 2.6 |
| V119 | Q384 | 2.9 |
| A120 | R380 | 3.1 |
| R129 | R38 | 3.3 |
| R124 | D225 | 2.2 |
| Polar (≤4.0 Å) | N50 | Y391 | 4.0 |
| S213 | R385 | 3.7 |
| A207 | Q384 | 3.8 |
| S213 | Y360 | 3.9 |
| A126 | R38 | 3.6 |
| Charge- charge (≤6 Å) | E218 | R389 | 4.9 |
| E218 | R385 | 2.1 |

**Supplementary Table 6: Interaction of GPR4 and Gαs in the GPR4pH7.6- Gαs complex.**

| **Interactions** | **GPR4** | **Gαs** | **Distance (Å)** |
| --- | --- | --- | --- |
| Hydrophobic and van der Waals  (≤4.5 Å) | I222 | L394 | 4.3 |
| V119 | L393 | 3.9 |
| I204 | 4.4 |
| L52 | E392 | 4.1 |
| R115 | Y391 | 4.4 |
| A118 | 3.5 |
| V119 | L388 | 3.6 |
| V208 | 4.2 |
| I222 | 4.4 |
| P122 | H387 | 4.4 |
| S213 | R385 | 3.8 |
| V119 | Q384 | 4.3 |
| P122 | 4.3 |
| L123 | I383 | 3.7 |
| L123 | R380 | 3.7 |
| L123 | F376 | 3.6 |
| S211 | D381 | 3.5 |
| H-Bond (≤3.5 Å) | Q45 | E392 | 2.7 |
| N290 | 2.6 |
| A118(main chain) | H387 | 2.9 |
| S213 | D381 | 3.1 |
| Polar (≤4.0 Å) | Y286 | E392 | 3.7 |
| E51 | Y391 | 3.8 |
| D114 | 3.9 |
| N50 | Q390 | 3.6 |
| V119(main chain) | Q384 | 3.6 |
| Charge-charge (≤6.0 Å) | R115 | E392 | 5.2 |
| E218 | R389 | 5.6 |
| E218 | R385 | 3.2 |
| R124 | D225 | 5.1 |

**Supplementary Table 7: Interaction of GPR4 and Gαs in the GPR4pH7.2- Gαs complex.**

| **Interactions** | **GPR4** | **Gαs** | **Distance (Å)** |
| --- | --- | --- | --- |
| Hydrophobic and van der Waals  (≤4.5 Å) | E218 | L394 | 3.5 |
| I222 | 3.8 |
| R115 | L393 | 3.6 |
| V119 | 4.1 |
| I204 | 4.1 |
| L225 | 3.9 |
| L56 | E392 | 3.5 |
| L52 | 3.8 |
| A118 | T391 | 3.4 |
| N50 | 4.4 |
| A118 | 3.5 |
| L52 | 4.3 |
| V208 | L388 | 4.0 |
| I222 | 3.5 |
| T214 | 4.3 |
| V119 | 4.0 |
| P122 | H387 | 3.7 |
| S213 | R385 | 3.7 |
| L123 | I383 | 3.8 |
| P122 | 3.7 |
| P122 | R380 | 4.3 |
| L123 | 3.6 |
| L123 | F376 | 3.6 |
| H-Bond (≤3.5 Å) | Y286  (main chain) | E392 | 2.9 |
| D114 | 3.5 |
| E51 | T391 | 2.2 |
| R115 | T391 | 3.3 |
| N50 | Q390 | 3.2 |
| A118  (main chain) | H387 | 3.0 |
| R129 | 3.5 |
| V119  (main chain) | Q384 | 3.4 |
| S213 | D381 | 3.4 |
| V212 | 3.1 |
| S211 | 3.5 |
| A120  (main chain) | R380 | 3.1 |
| S213 | Y360 | 2.4 |
| V212 | Y358 | 3.3 |
| Polar (≤4.0 Å) | R129 | T391 | 3.8 |
| Q45 | E392 | 4.0 |
| N290 | E392 | 4.0 |
| T214 | R385 | 3.8 |
| S211 | Q384 | 3.7 |
| A207  (main chain) | 3.7 |
| G120  (main chain) | D381 | 4.0 |
| Charge-charge (≤6.0 Å) | R115 | E392 | 5.2 |
| R124 | D225 | 5.7 |
| E218 | R389 | 6.0 |
| E218 | R385 | 3.1 |

**Supplementary Table 8: Interaction of GPR4 and Gαq in the GPR4pH6.5- Gαq complex.**

| **Interactions** | **GPR4** | **Gαq** | **Distance (Å)** |
| --- | --- | --- | --- |
| Hydrophobic and van der Waals  (≤4.5 Å) | I222 | V359 | 3.7 |
| N290 | 4.3 |
| R115 | L358 | 3.7 |
| Y201 | 4.4 |
| I204 | 4.2 |
| V119 | 3.8 |
| I222 | 3.3 |
| A118 | Y356 | 3.4 |
| R115 | 4.2 |
| L52 | 3.8 |
| I204 | L353 | 3.6 |
| V208 | 3.8 |
| I222 | 3.5 |
| A118 | N352 | 3.9 |
| P122 | 3.6 |
| V119 | L349 | 4.2 |
| L123 | I348 | 3.5 |
| P122 | 3.9 |
| S211 | D346 | 3.9 |
| L123 | K345 | 3.7 |
| P122 | 3.8 |
| L123 | C344 | 4.2 |
| H-Bond (≤3.5 Å) | Q45 | N357 | 3.3 |
| R115 | 2.9 |
| Y286 | 3.4 |
| N290 | 3.5 |
| R129 | Y356 | 3.5 |
| A118(main chain) | N352 | 2.6 |
| S213 | Q350 | 2.8 |
| T214 | 2.4 |
| S213 | D346 | 2.8 |
| Polar  (≤4.0 Å) | D114 | Y356 | 3.9 |
| N50 |  | 3.7 |
| N50 | E355 | 3.9 |
| Q45 | 3.99 |
| R129 | N352 | 3.64 |
| S211 | Q350 | 3.77 |

**Supplementary Table 9: Interaction of GPR68 and Gαs in the GPR68pH6.0- Gαs complex.**

| **Interactions** | **GPR68** | **Gαs** | **Distance (Å)** |
| --- | --- | --- | --- |
| Hydrophobic and Var der Waals  (≤4.5 Å) | S290 | L394 | 4.3 |
| I226 | 3.6 |
| R222 | 4.2 |
| V123 | L393 | 4.2 |
| L229 | 3.7 |
| I226 | 2.8 |
| R119 | 4.2 |
| I208 | 4.3 |
| L60 | E392 | 4.1 |
| L229 | 4.4 |
| Y286 | 2.9 |
| S290 | 4.4 |
| T292 | 4.0 |
| L56 | Y391 | 3.6 |
| A122 | 3.5 |
| V212 | L388 | 4.1 |
| V123 | 3.4 |
| V123 | H387 | 4.4 |
| P126 | 4.0 |
| G217 | R385 | 4.0 |
| T218 | 3.9 |
| P126 | Q384 | 4.1 |
| A211 | 3.8 |
| S215 | 4.5 |
| F127 | I383 | 4.0 |
| P126 | 3.6 |
| P126 | R380 | 4.0 |
| F127 | 3.8 |
| F127 | C379 | 4.1 |
| F376 | 3.3 |
| F276 | 3.5 |
| V227 | 4.1 |
| F229 | 4.4 |
| H41 | 3.3 |
| T134 | R38 | 3.9 |
| R133 | 4.5 |
| Polar  (≤4.0 Å) | E291 | L394 | 3.7 |
| Q49 | E392 | 3.9 |
| D118 | Y391 | 3.9 |
| R119 | 3.6 |
| R133 | H387 | 3.9 |
| G217 | D381 | 3.6 |
| H-Bond (≤3.5 Å) | Y286 | E392 | 2.9 |
| R133 | Y391 | 3.4 |
| N54 | Q390 | 3.5 |
| A122 | H387 | 2.5 |
| V123 | Q384 | 3.1 |
| S215 | D381 | 2.9 |
| A124 | R380 | 3.1 |
| H130 | R38 | 2.9 |
| Charge-charge (≤6 Å) | R119 | E392 | 3.4 |
| H216 | D381 | 4.2 |
| R128 | D225 | 6.0 |

**Supplementary Table 10: Interaction of GPR68 and Gαs in the GPR68pH6.8- Gαs complex.**

| **Interactions** | **GPR68** | **Gαs** | **Distance (Å)** |
| --- | --- | --- | --- |
| Hydrophobic and van der Waals  (≤4.5 Å) | R222 | L394 | 3.7 |
| I226 | 3.7 |
| S290 | 4.2 |
| T218 | 4.4 |
| Q225 | 3.9 |
| L229 | L393 | 3.0 |
| I208 | 4.1 |
| V123 | 4.1 |
| V230 | 3.9 |
| R119 | 3.9 |
| I226 | 3.6 |
| L229 | E392 | 3.7 |
| Y286 | 3.8 |
| L60 | 3.0 |
| L56 | 2.6 |
| Q49 | 4.1 |
| S290 | 3.4 |
| T292 | 4.5 |
| R119 | Y391 | 3.8 |
| L56 | 3.5 |
| D118 | 3.2 |
| N54 | 4.2 |
| A122 | 3.5 |
| Q49 | Q390 | 3.8 |
| T292 | R389 | 3.7 |
| I226 | L388 | 3.8 |
| T218 | 4.5 |
| V123 | 4.0 |
| V212 | 4.2 |
| P126 | H387 | 4.3 |
| R133 | 3.2 |
| A122 | 3.6 |
| T218 | R385 | 3.3 |
| G217 | 3.7 |
| V123 | Q384 | 3.1 |
| P126 | 3.7 |
| S215 | 4.3 |
| F127 | I383 | 4.3 |
| P126 | 3.4 |
| S215 | D381 | 3.3 |
| F127 | R380 | 3.6 |
| P126 | 3.7 |
| H125 | 4.4 |
| F127 | F376 | 3.0 |
| H216 | Y358 | 3.2 |
| G217 | 3.4 |
| H216 | Y366 | 3.8 |
| F127 | V227 | 3.0 |
| F127 | H41 | 3.5 |
| H130 | R38 | 3.8 |
| H130 | A39 | 3.9 |
| F127 | C346 |  |
| F127 | C379 | 3.9 |
| H-Bond (≤3.5 Å) | E291 | L394 | 3.3 |
| N54 | Q390 | 2.7 |
| R133 | Y391 | 3.2 |
| A122 | H387 | 2.5 |
| A211 | Q384 | 3.5 |
| H216 | D381 | 3.4 |
| G217 | 3.3 |
| A124 | R380 | 2.4 |
| π-π stacking  (Edge-π, ≤8.0 Å) | F127 | F376 | 3.0 |
