# Supplementary material for: Structural basis and biased signaling of proton sensation by GPCRs mediated by extracellular histidine rearrangement
Source: Research Square preprint supplement (doi:10.21203/rs.3.rs-4306086/v1), 2024-04-29
Supplement: Supplementary file 2 [file f894b181163e01e962a7fc88.docx]

**Extended data Fig. 1**

**
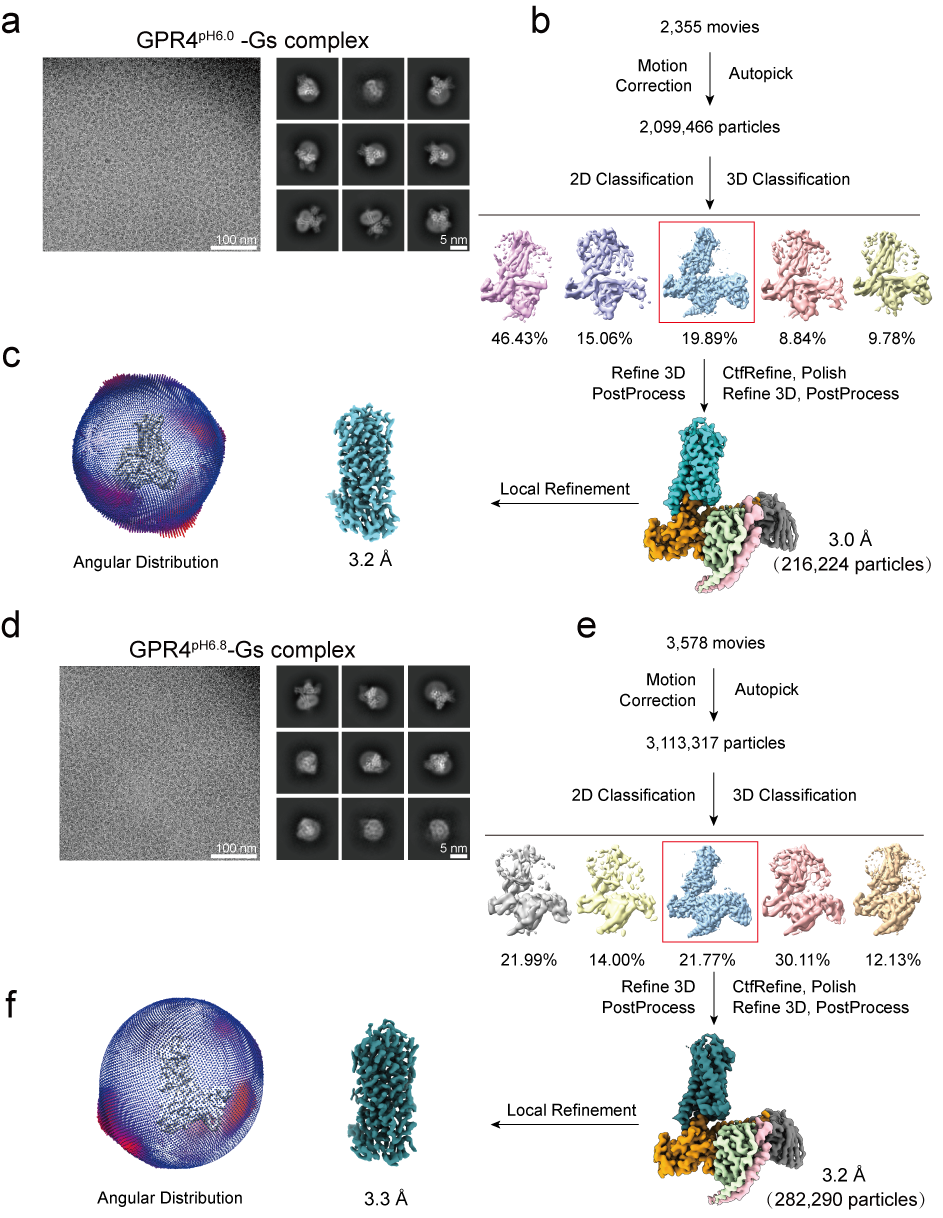
**

**Extended data Fig. 1 | Cryo-EM images and single particle reconstruction of the EM map of the** **GPR4pH6.0-Gs and GPR4pH6.8 -Gs complexes.**

**a,** Representative Cryo-EM micrograph and two-dimensional (2D) class averages of GPR4pH6.0-Gs particles (Scale bar: 100 nm).

**b,** Flow chart for three-dimensional (3D) classification of GPR4pH6.0-Gs particles. Representative Cryo-EM micrographs from 2,355 movies and representative 2D class averages determined using approximately 216,224 particles after 3D classification are shown. Initial micrographs were processed with UCSF MotionCor2 and Relion. 3D volume of classes and refinements are shown and red box indicated selected classes.

**c,** We have performed mask for receptor-alone for GPR4pH6.0-Gs complex structures. The result indicated that mask of receptor region in GPR4pH6.0-Gs complexes significantly improved the map quality of extracellular region of GPR4pH6.0.

**d,** Representative Cryo-EM micrograph and two-dimensional (2D) class averages of GPR4pH6.8-Gs particles (Scale bar: 100 nm).

**e,** Flow chart for three-dimensional (3D) classification of GPR4pH6.8-Gs particles. Representative Cryo-EM micrographs from 3,578 movies and representative 2D class averages determined using approximately 282,290 particles after 3D classification are shown. Initial micrographs were processed with UCSF MotionCor2 and Relion. 3D volume of classes and refinements are shown, and red box indicated selected classes.

**f**, we have performed mask for receptor-alone for GPR4pH6.8-Gs complex structures. The result indicated that mask of receptor region in GPR4pH6.8-Gs complexes significantly improved the map quality of extracellular region of GPR4pH6.8.

**Extended data Fig. 2**

**
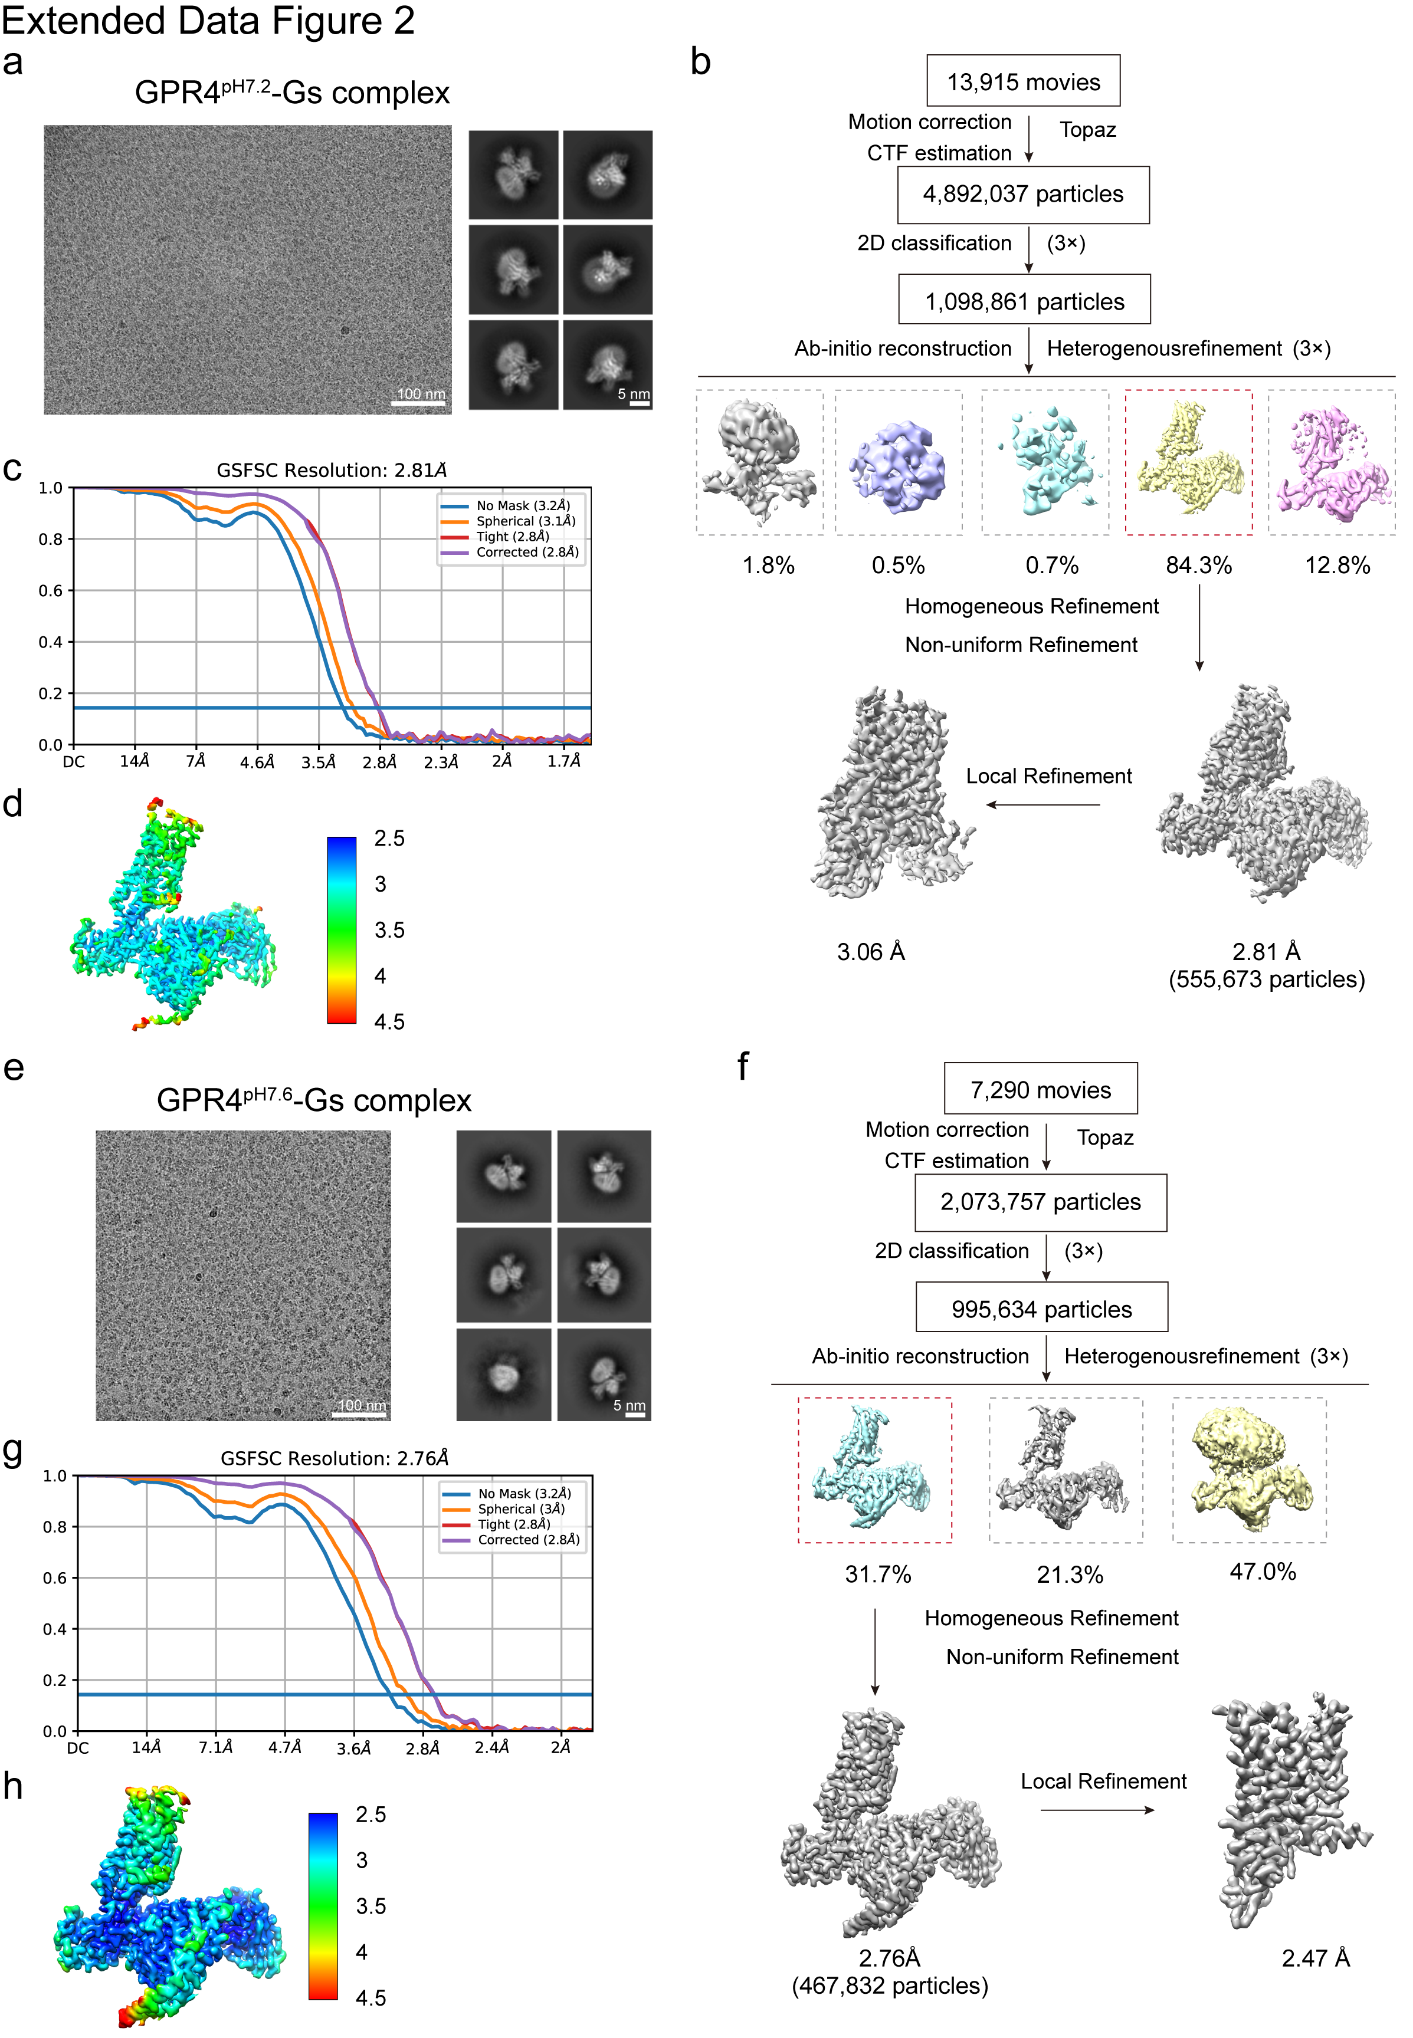
**

**Extended data Fig.2| Cryo-EM images and single particle reconstruction of the EM map of the GPR4pH7.6-Gs and GPR4pH7.2-Gs complexes.**

**a,** Representative Cryo-EM micrograph and two-dimensional (2D) class averages of GPR4pH7.2-Gs particles (Scale bar: 100 nm). Representative Cryo-EM micrograph from 13,915 movies and representative two-dimensional class averages determined using approximately 555,673 particles after 3D classification were shown.

**b,** Flow chart for three-dimensional (3D) classification of GPR4pH7.2-Gs particles. Representative Cryo-EM micrographs from 13,915 movies and representative 2D class averages determined using approximately 555,673 particles after 3D classification are shown. Initial micrographs were processed with UCSF MotionCor2 and cryoSPARC. 3D volume of classes and refinements are shown and red box indicated selected classes. We have performed mask for receptor-alone for GPR4pH7.2-Gs complex structures. The result indicated that mask of receptor region in GPR4pH7.2-Gs complexes significantly improved the map quality of specific region of GPR4pH7.2.

**c**, Fourier shell correlation curves for the final 3D density map of GPR4pH7.2-Gs complex. At the FSC 0.143 cut-off, the overall resolution for the map is 2.81 Å.

**d**,3D density map colored according to local resolution (Å) of the GPR4pH7.2-Gs complex.

**e,** Representative Cryo-EM micrograph and two-dimensional (2D) class averages of GPR4pH7.6-Gs particles (Scale bar: 100 nm). Representative Cryo-EM micrograph from 7,433 movies and representative two-dimensional class averages determined using approximately 2,161,289 particles after 3D classification were shown.

**f,** Flow chart for three-dimensional (3D) classification of GPR4pH7.6-Gs particles. Representative Cryo-EM micrographs from 7,433 movies and representative 2D class averages determined using approximately 2,161,289 particles after 3D classification are shown. Initial micrographs were processed with UCSF MotionCor2 and cryoSPARC. 3D volume of classes and refinements are shown and red box indicated selected classes. We have performed mask for receptor-alone for GPR4pH7.6-Gs complex structures. The result indicated that mask of receptor region in GPR4pH7.6-Gs complexes significantly improved the map quality of specific region of GPR4pH7.6.

**g**, Fourier shell correlation curves for the final 3D density map of GPR4pH7.6-Gs complex. At the FSC 0.143 cut-off, the overall resolution for the map is 2.76 Å.

**h**,3D density map colored according to local resolution (Å) of the GPR4pH7.6-Gs complex.

**Extended data Fig. 3**

**
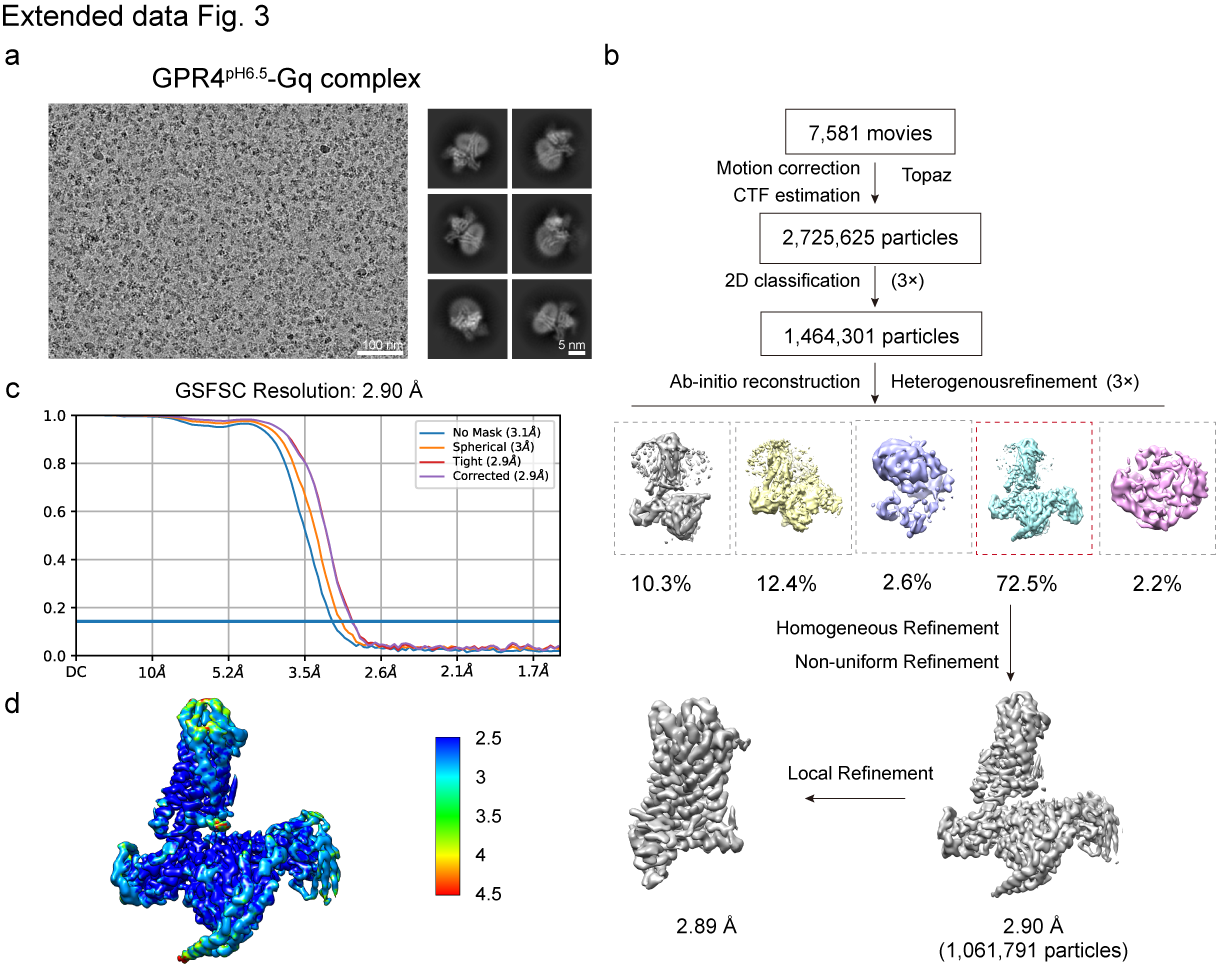
**

**Extended data Fig. 3 | Cryo-EM images and single particle reconstruction of the EM map of the GPR4pH6.5-Gq.**

**a,** Representative Cryo-EM micrograph and two-dimensional (2D) class averages of GPR4pH6.5-Gq particles (Scale bar: 100 nm). Representative Cryo-EM micrograph from 7,581 movies and representative two-dimensional class averages determined using approximately 1,061,791 particles after 3D classification were shown.

**b,** Flow chart for three-dimensional (3D) classification of GPR4pH6.5-Gq particles. Representative Cryo-EM micrographs from 7,581 movies and representative 2D class averages determined using approximately 1,061,791 particles after 3D classification are shown. Initial micrographs were processed with UCSF MotionCor2 and cryoSPARC. 3D volume of classes and refinements are shown and red box indicated selected classes. We have performed mask for receptor-alone for GPR4pH6.5-Gq complex structures. The result indicated that mask of receptor region in GPR4pH6.5-Gq complexes significantly improved the map quality of extracellular region of GPR4pH6.5.

**c**, Fourier shell correlation curves for the final 3D density map of GPR4pH6.5-Gq complex. At the FSC 0.143 cut-off, the overall resolution for the map is 2.90 Å.

**d**,3D density map colored according to local resolution (Å) of the GPR4pH6.5-Gq complex.

**Extended data Fig. 4**

**
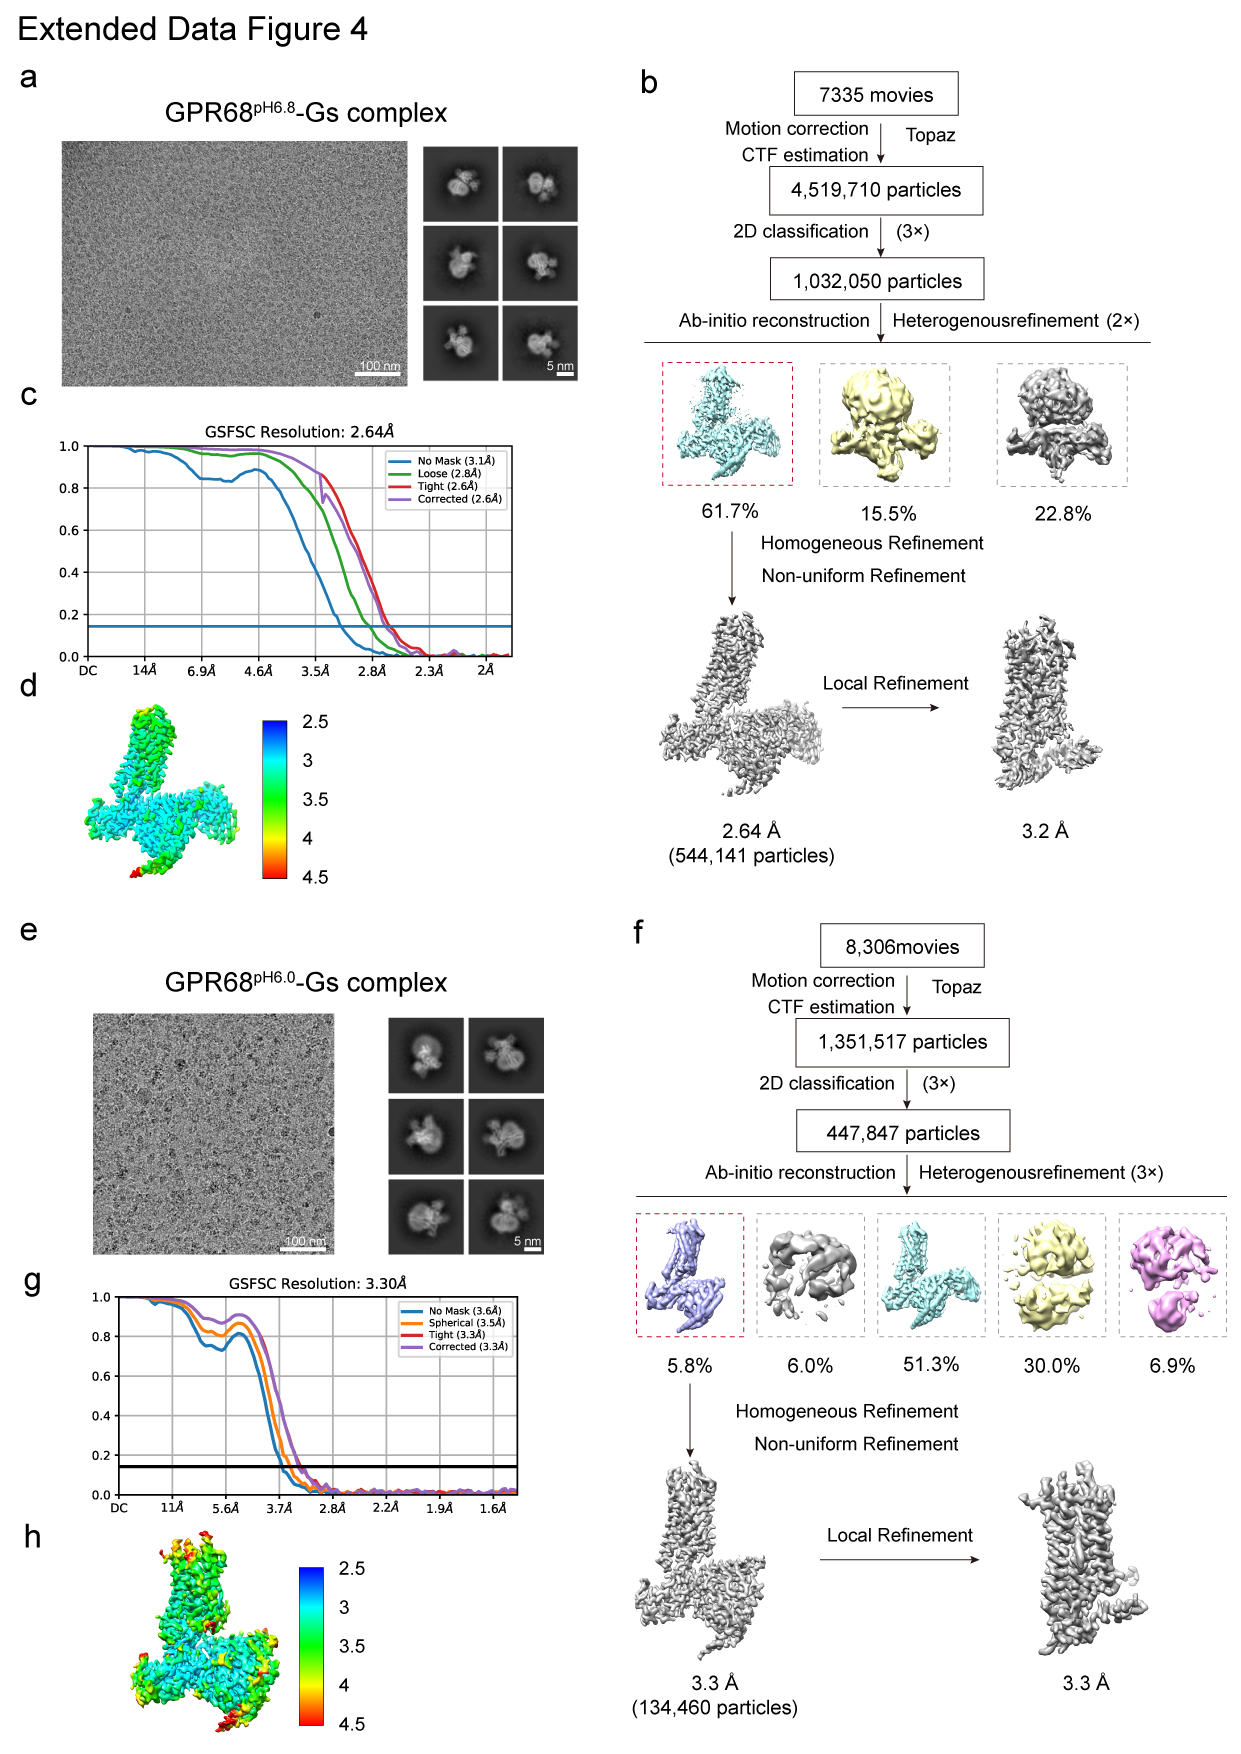
**

**Extended data Fig. 4 | Cryo-EM images and single particle reconstruction of the EM map of the GPR68pH6.0-Gs and GPR68pH6.8-Gs complexes.**

**a,** Representative Cryo-EM micrograph and two-dimensional (2D) class averages of GPR68pH6.8-Gs particles (Scale bar: 100 nm).

**b,** Flow chart for three-dimensional (3D) classification of GPR68pH6.8-Gs particles. Representative Cryo-EM micrographs from 7,355 movies and representative 2D class averages determined using approximately 544,141 particles after 3D classification are shown. Initial micrographs were processed with UCSF MotionCor2 and cryoSPARC. 3D volume of classes and refinements are shown and red box indicated selected classes. We have performed mask for receptor-alone for GPR68pH6.8-Gs complex structures. The result indicated that mask of receptor region in GPR68pH6.8-Gs complexes significantly improved the map quality of specific region of GPR68.

**c**, Fourier shell correlation curves for the final 3D density map of GPR68pH6.8-Gs complex. At the FSC 0.143 cut-off, the overall resolution for the map is 2.64 Å.

**d**,3D density map colored according to local resolution (Å) of the GPR68pH6.8-Gs complex.

**e,** Representative Cryo-EM micrograph and two-dimensional (2D) class averages of GPR68pH6.0-Gs particles (Scale bar: 100 nm).

**f,** Flow chart for three-dimensional (3D) classification of GPR68pH6.0-Gs particles. Representative Cryo-EM micrographs from 6,013 movies and representative 2D class averages determined using approximately 211,925 particles after 3D classification are shown. Initial micrographs were processed with UCSF MotionCor2 and cryoSPARC. 3D volume of classes and refinements are shown and red box indicated selected classes. We have performed mask for receptor-alone for GPR68pH6.0-Gs complex structures. The result indicated that mask of receptor region in GPR68pH6.0-Gs complexes significantly improved the map quality of specific region of GPR68pH6.0.

**g**, Fourier shell correlation curves for the final 3D density map of GPR68pH6.0-Gs complex. At the FSC 0.143 cut-off, the overall resolution for the map is 3.3 Å.

**h**,3D density map colored according to local resolution (Å) of the GPR68pH6.0-Gs complex.

**Extended data Fig. 5**

**
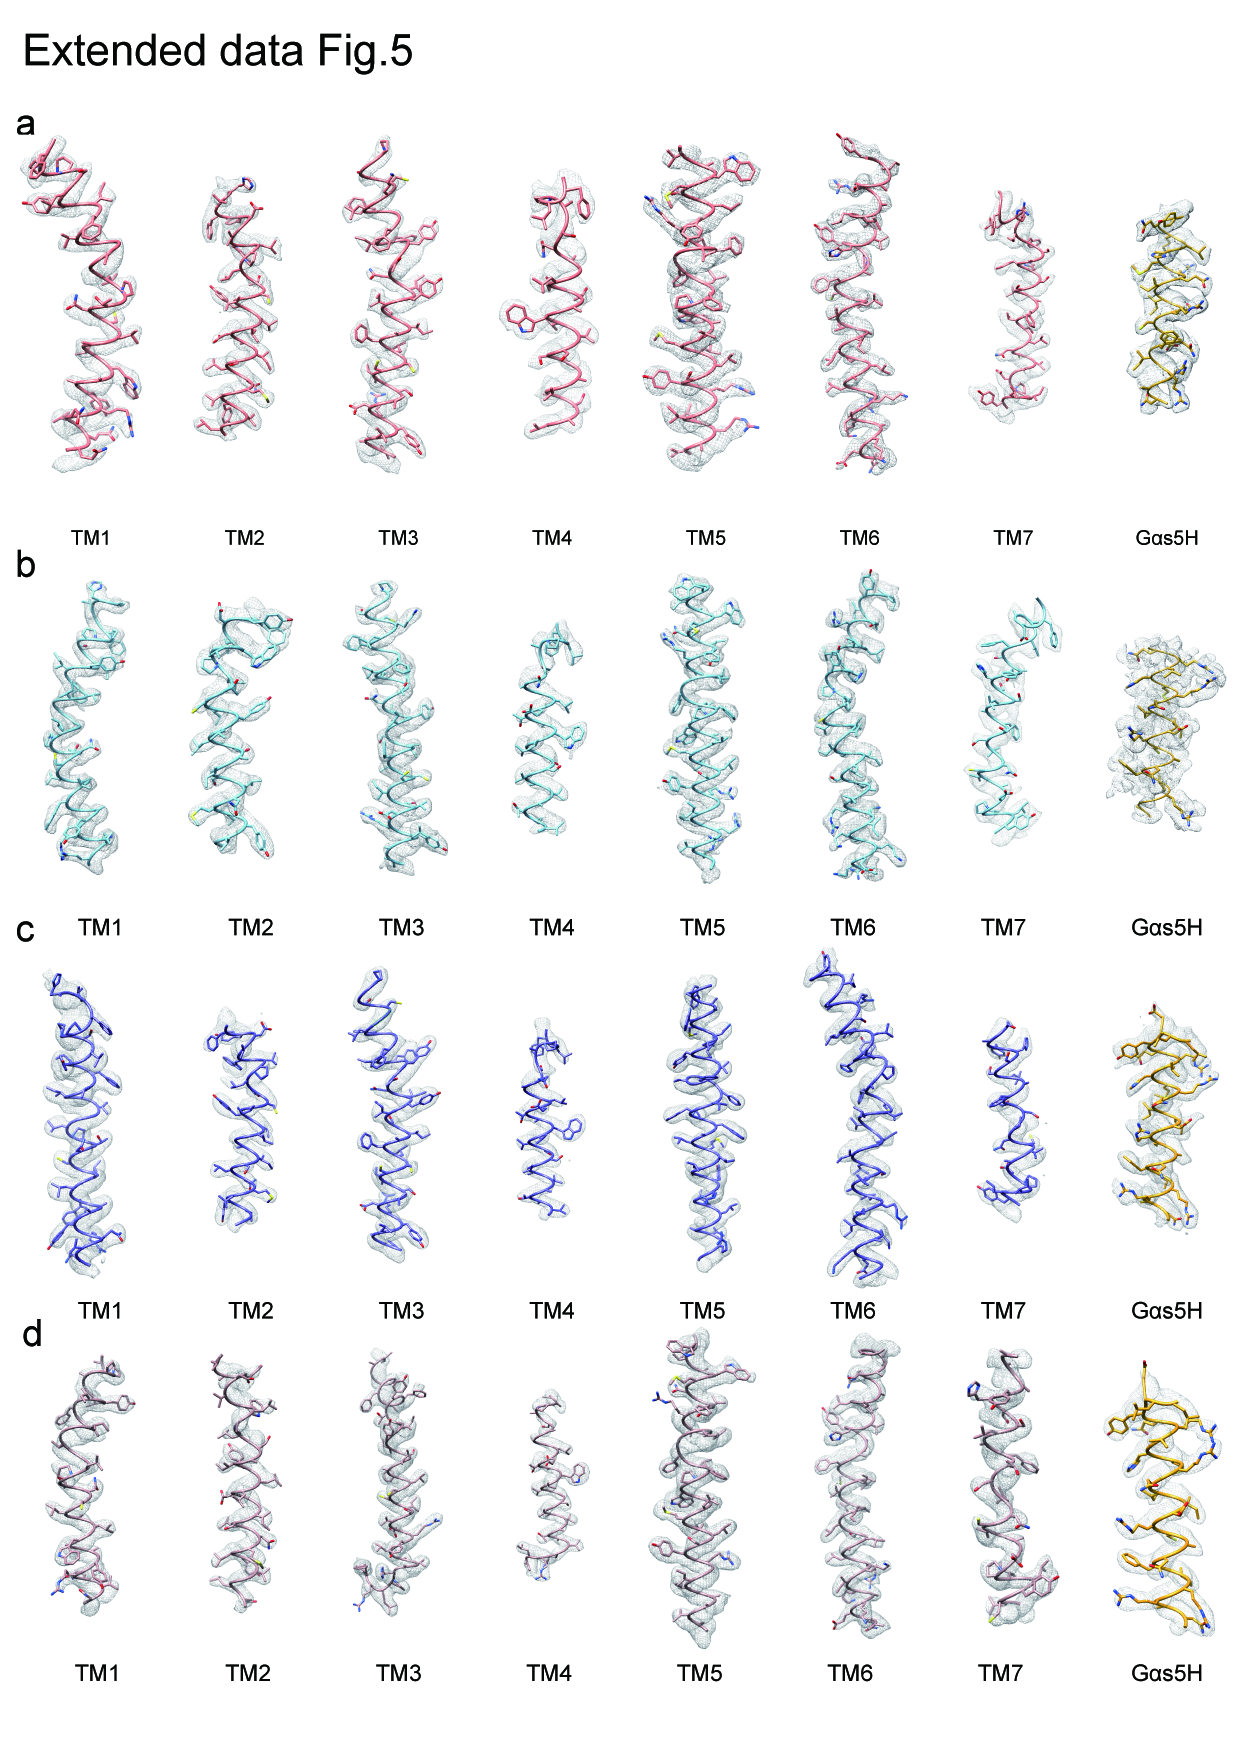
**

**Extended data Fig. 5 | Cryo-EM density maps of the GPR4pH6.0-Gs, GPR4pH6.8-Gs, GPR4pH7.2-Gs and GPR4pH7.6-Gs.**

**a-d,** Cryo-EM density maps and models are shown for TM1-TM7 of GPR4 and α5 helix of Gαs in the GPR4pH6.0-Gs complex using the global map of GPR4pH6.0-Gs complex with map threshold at 0.0890. a, in the GPR4pH6.8-Gs complex using the global map of GPR4pH6.8-Gs complex with map threshold at 0.2622. b, in the GPR4pH7.2-Gs complex using the global map of GPR4pH7.2-Gs complex with map threshold at 0.1359. c, in the GPR4pH7.6-Gs complex using the global map of GPR4pH7.6-Gs complex with map threshold at 0.16. d. When using “Color Zone” tool in Chimera, we set the color radius at 3 Å.

**Extended data Fig. 6**

**
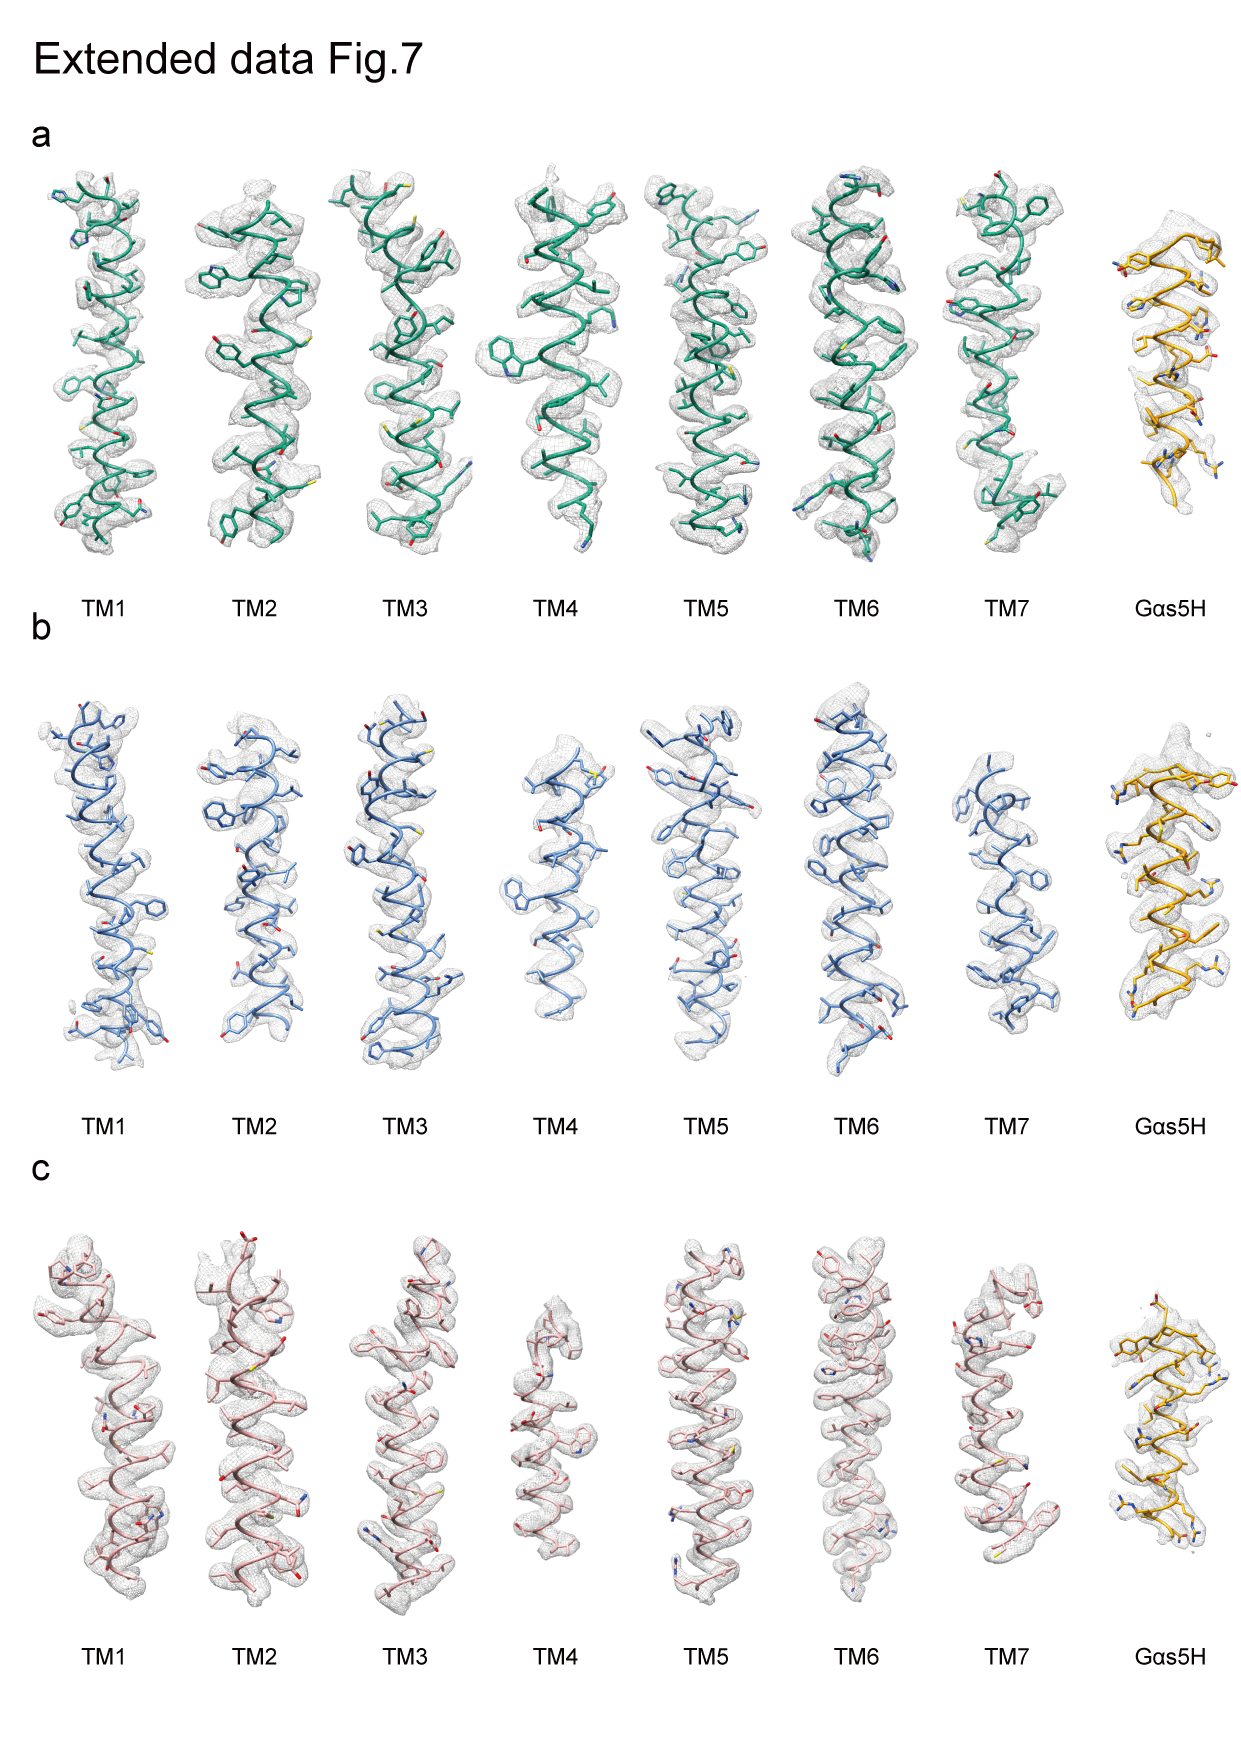
**

**Extended data Fig. 6 | Cryo-EM density maps of the GPR68pH6.0-Gs, GPR68pH6.8-Gs and GPR4pH6.5-Gq.**

**a-c,** Cryo-EM density maps and models are shown for TM1, TM2, TM3, TM4, TM5, TM6, TM7 of GPR4/GPR68 and α5 helix of Gαs in the GPR68pH6.0-Gs complex using the global map of GPR68pH6.0-Gs complex with map threshold at 0.0503. a, in the GPR68pH6.8-Gs complex using the global map of GPR68pH6.8-Gs complex with map threshold at 0.8381. b, in the GPR4pH6.5-Gq complex using the global map of GPR4pH6.5-Gq complex with map threshold at 0.1432. c, when using “Color Zone” tool in Chimera, we set the color radius at 3 Å.

**Extended data Fig. 7**

**
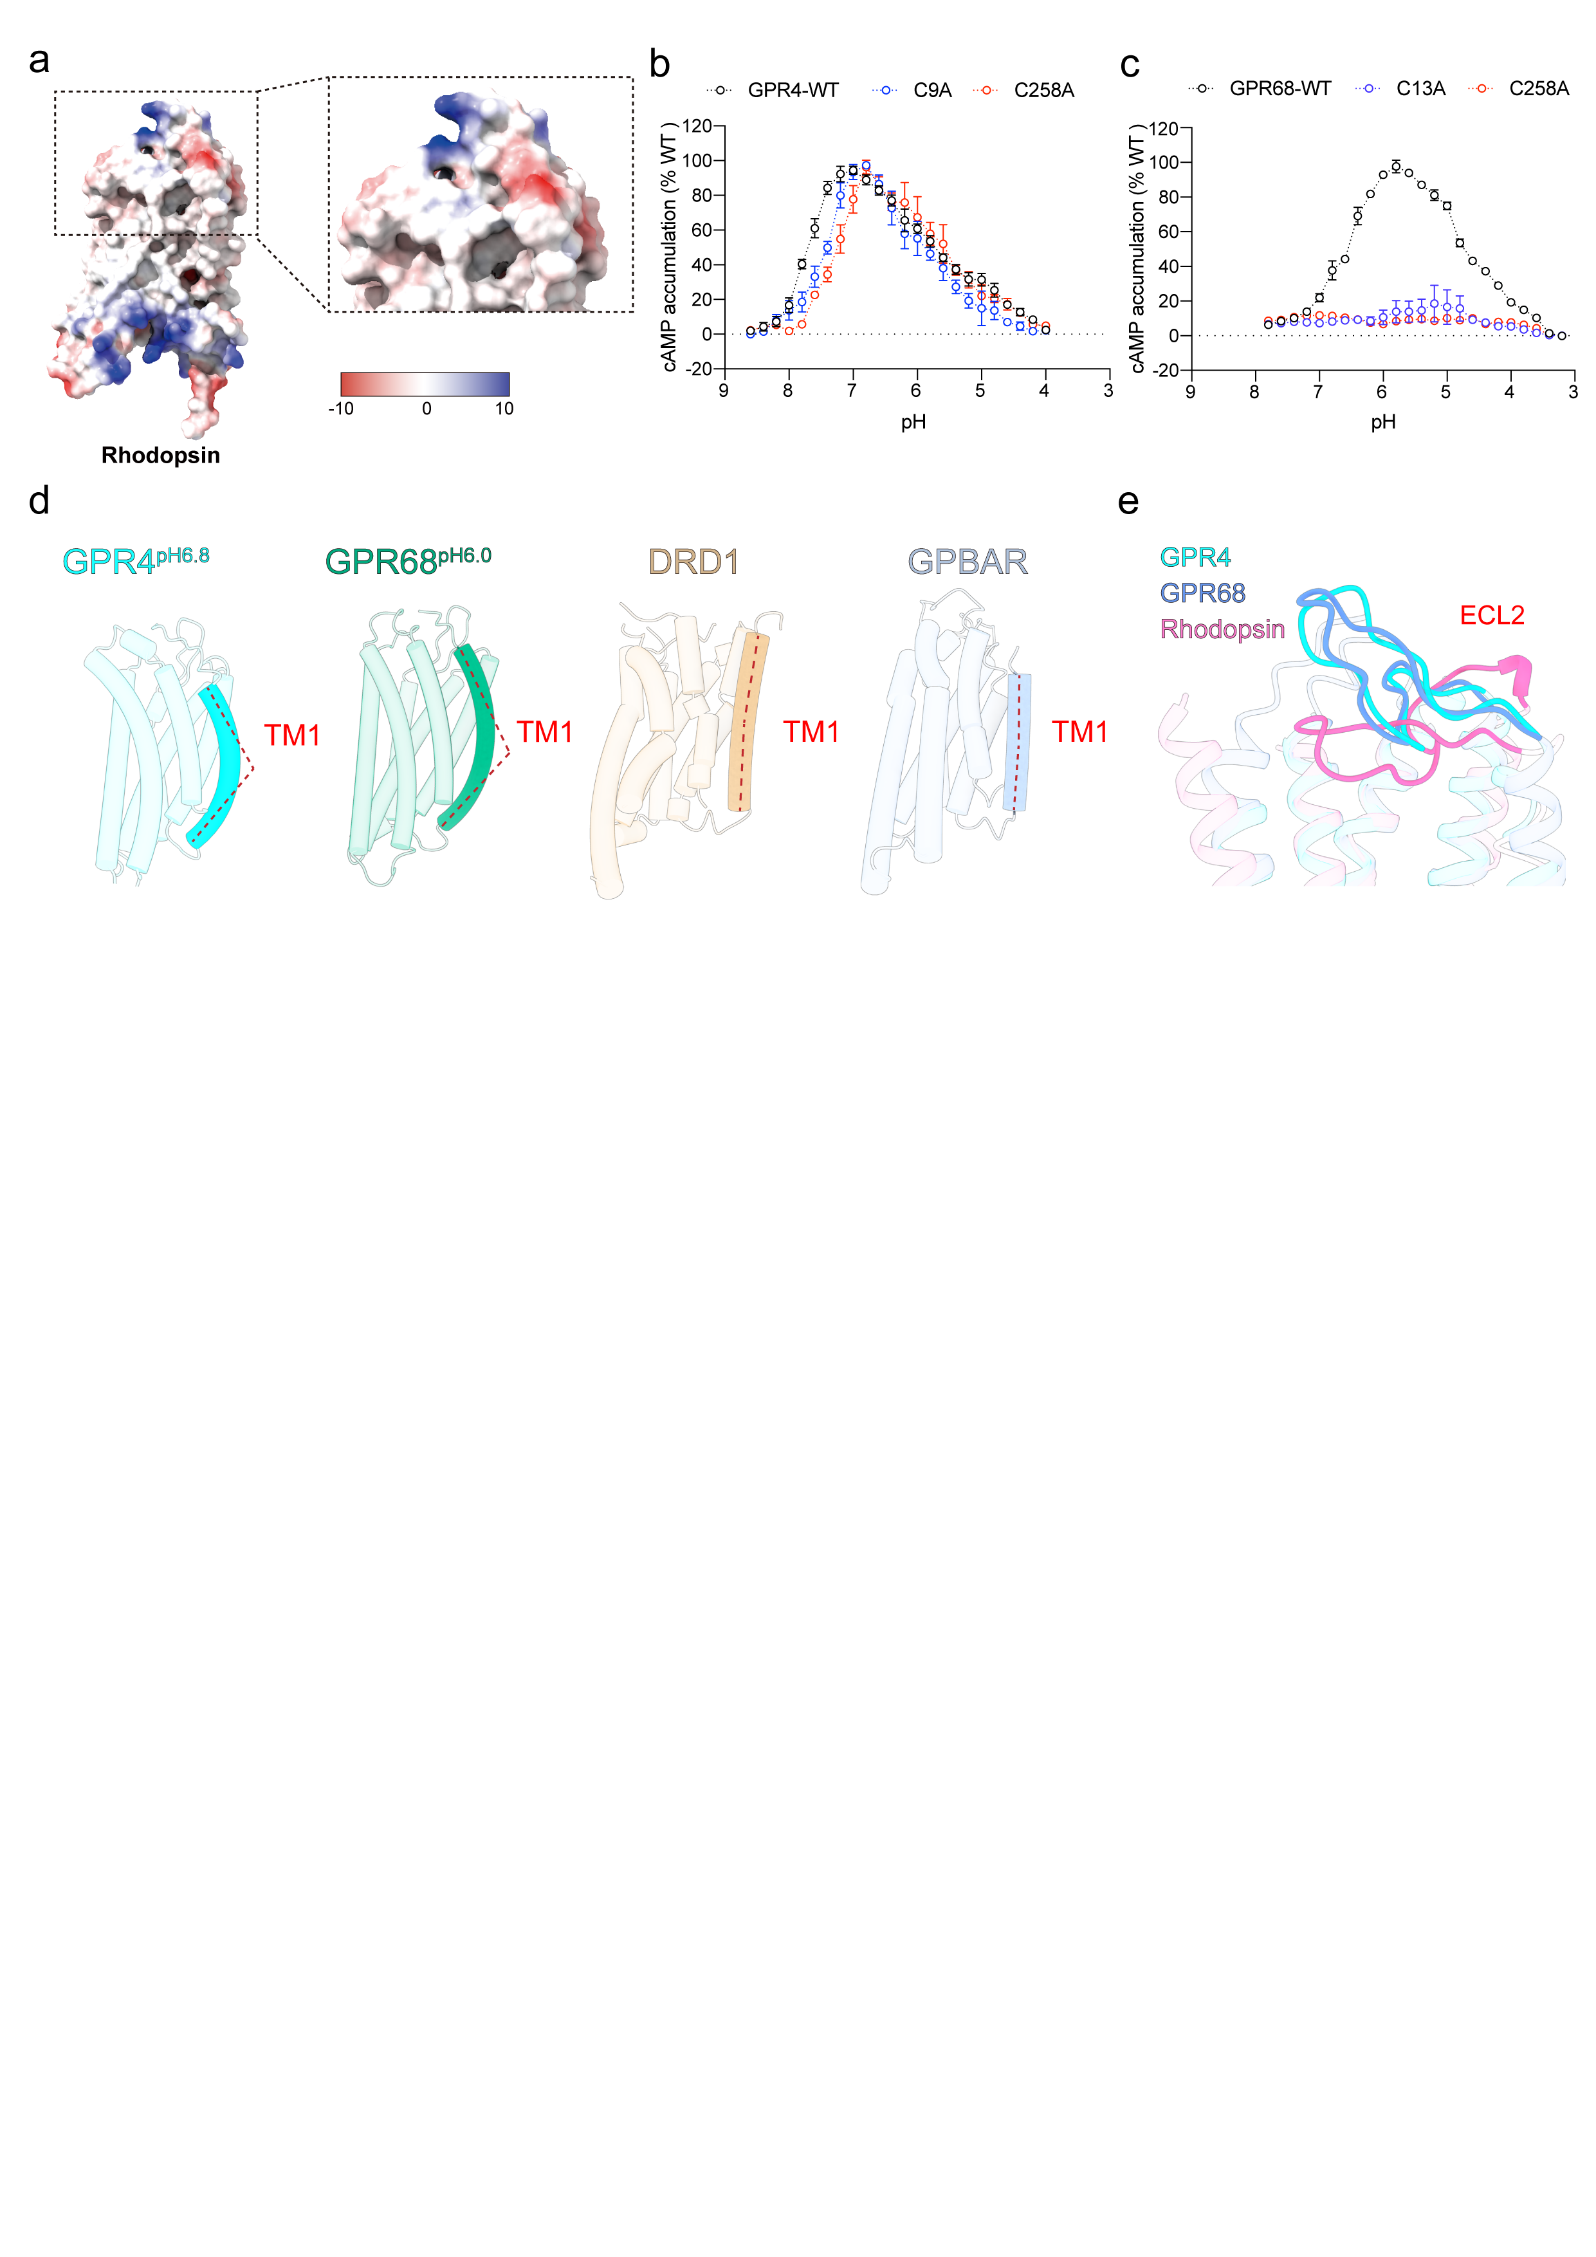
**

**Extended data Fig. 7 | Notable features in the active structures of GPR4pH6.8 and GPR68pH6.0 compared with other class A GPCRs**

**a,** Electrostatic potential map of upper region of the seven transmembrane domain of Rhodopsin. Red: negative charge; blue: positive charge; white: neutral.

**b,** Curves showing pH-dependent cAMP accumulation in cells overexpressing wild-type GPR4, C9Nter A mutant or C2587.25A mutant of GPR4. Values are represented as mean ± SEM of 3 independent experiments (n = 3).

**c,** Curves showing pH-dependent cAMP accumulation in cells overexpressing wild-type GPR68, C131.24A mutant or C258ECL3A mutant of GPR68. Values are represented as mean ± SEM of 3 independent experiments (n = 3).

**d,** Structural illustration of the TMD of GPR4pH6.8 (cyan), GPR68pH6.0 (green), DRD1 (yellow), GPBAR (light blue). Note that, compared with either DRD1 or GPBAR, TM1 of GPR4pH6.8 and GPR68pH6.0 were more curved.

**e,** Structural comparisons between the ECL2 of GPR4, GPR68 and Rhodopsin, GPR4 and GPR68 had a shifted outward movement.

**Extended data Fig. 8**

**
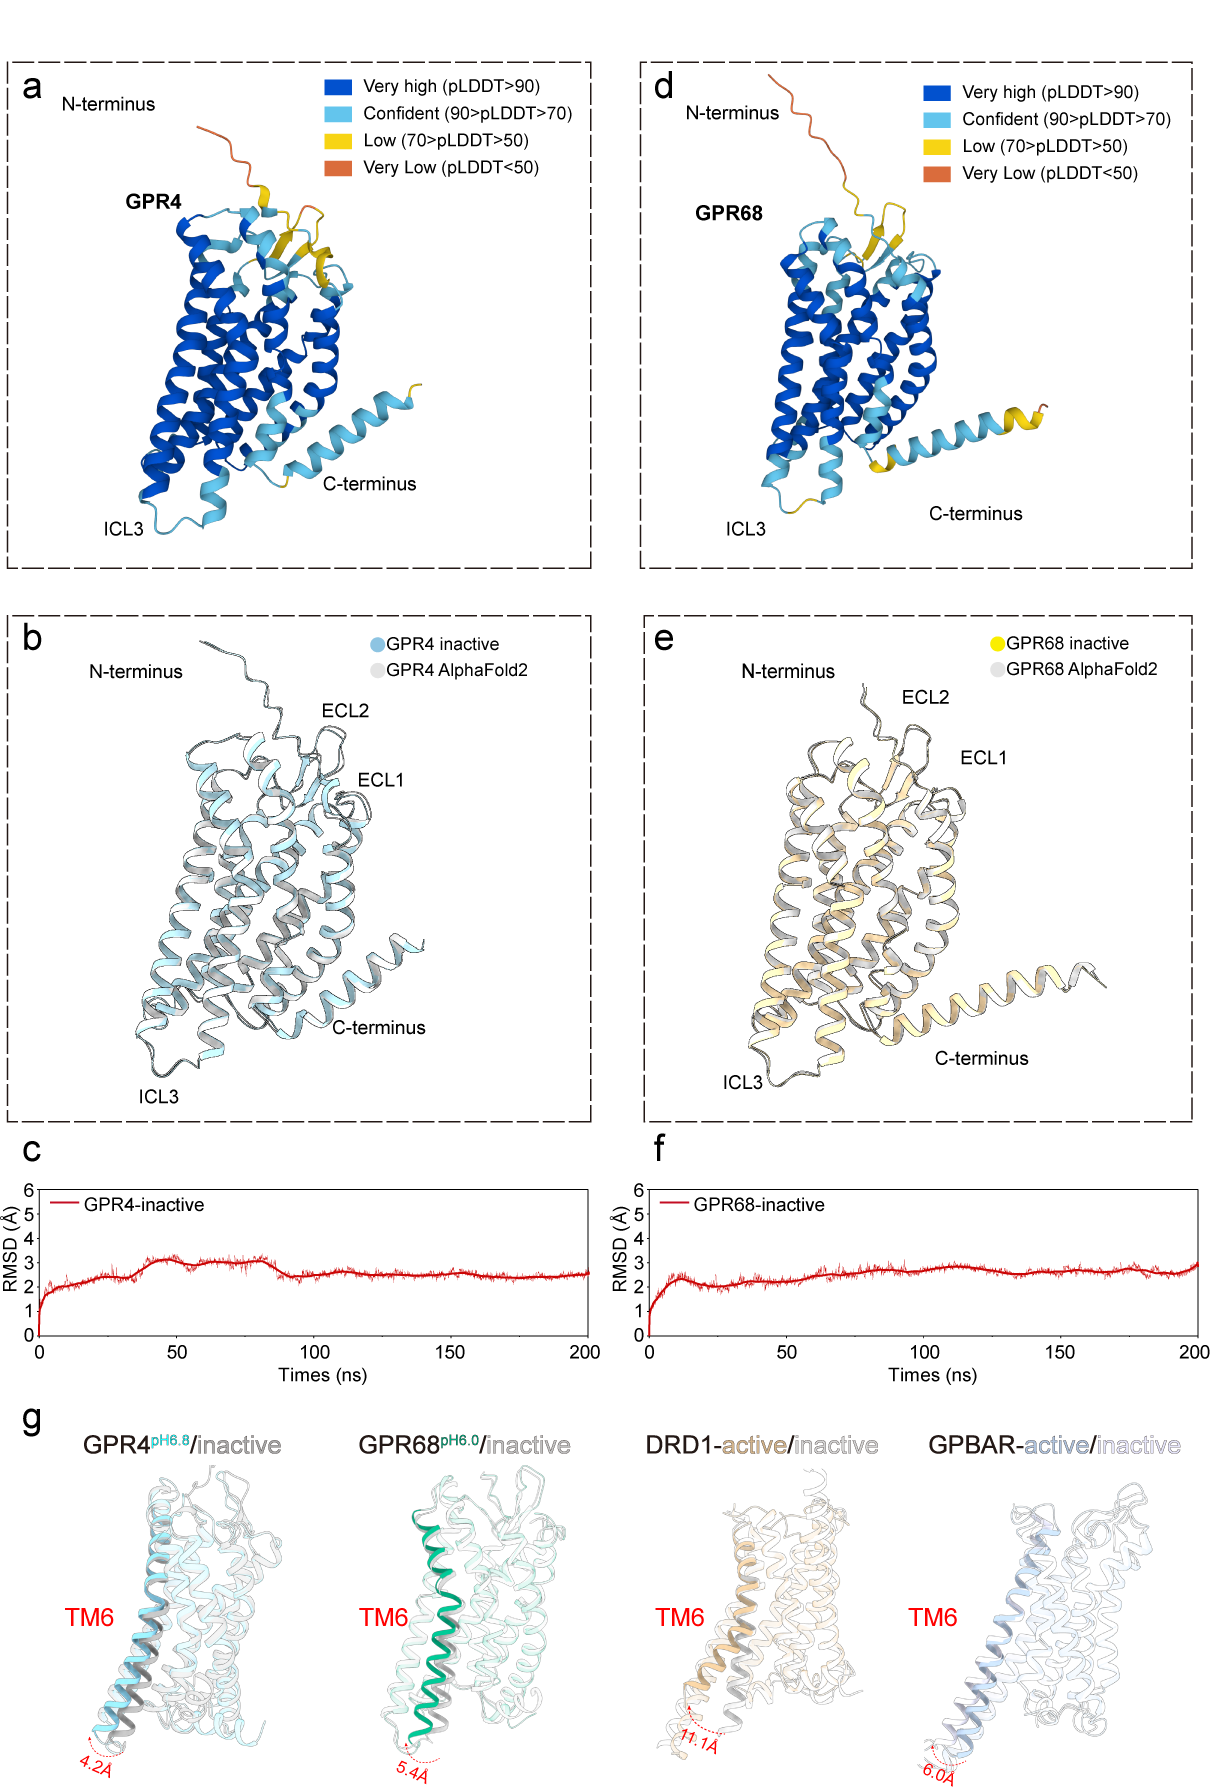
**

**Extended data Fig. 8 | The inactive structural models of GPR4 and GPR68**

**a,** Illustration of the apo-GPR4 structure predicted by AlphaFold2. The confidence level according to pLDDT were shown by different colors indicated in the figure.

**b,** Comparison between the simulated structure of apo GPR4 (cyan) and the model of apo GPR4 generated by AlphaFold2 (grey).

**c,** The average RMSD values of the simulated GPR4inactive structure during triplicate 200 ns MD simulations.

**d,** Illustration of the apo-GPR68 structure predicted by AlphaFold2. The confidence level according to pLDDT were shown by different colors indicated in the figure.

**e,** Comparison between the simulated structure of apo GPR68 (cyan) and the model of apo GPR68 generated by AlphaFold2 (navajo white).

**f,** The average RMSD values of the simulated GPR68 inactive structure during triplicate 200 ns MD simulations.

**g,** Structural superposition of inactive and active GPR4pH6.8, GPR68 pH6.0, DRD1 (PDB 7CKY) and GPBAR (PDB 7XTQ) from the side views. The movement directions of TM6 in these receptors relative to inactive state are highlighted as red arrows. GPR4pH6.8, GPR68 pH6.0, DRD1 and GPBAR are colored in sky blue, turquoise, tan and light steel blue, respectively.

**Extended data Fig. 9**


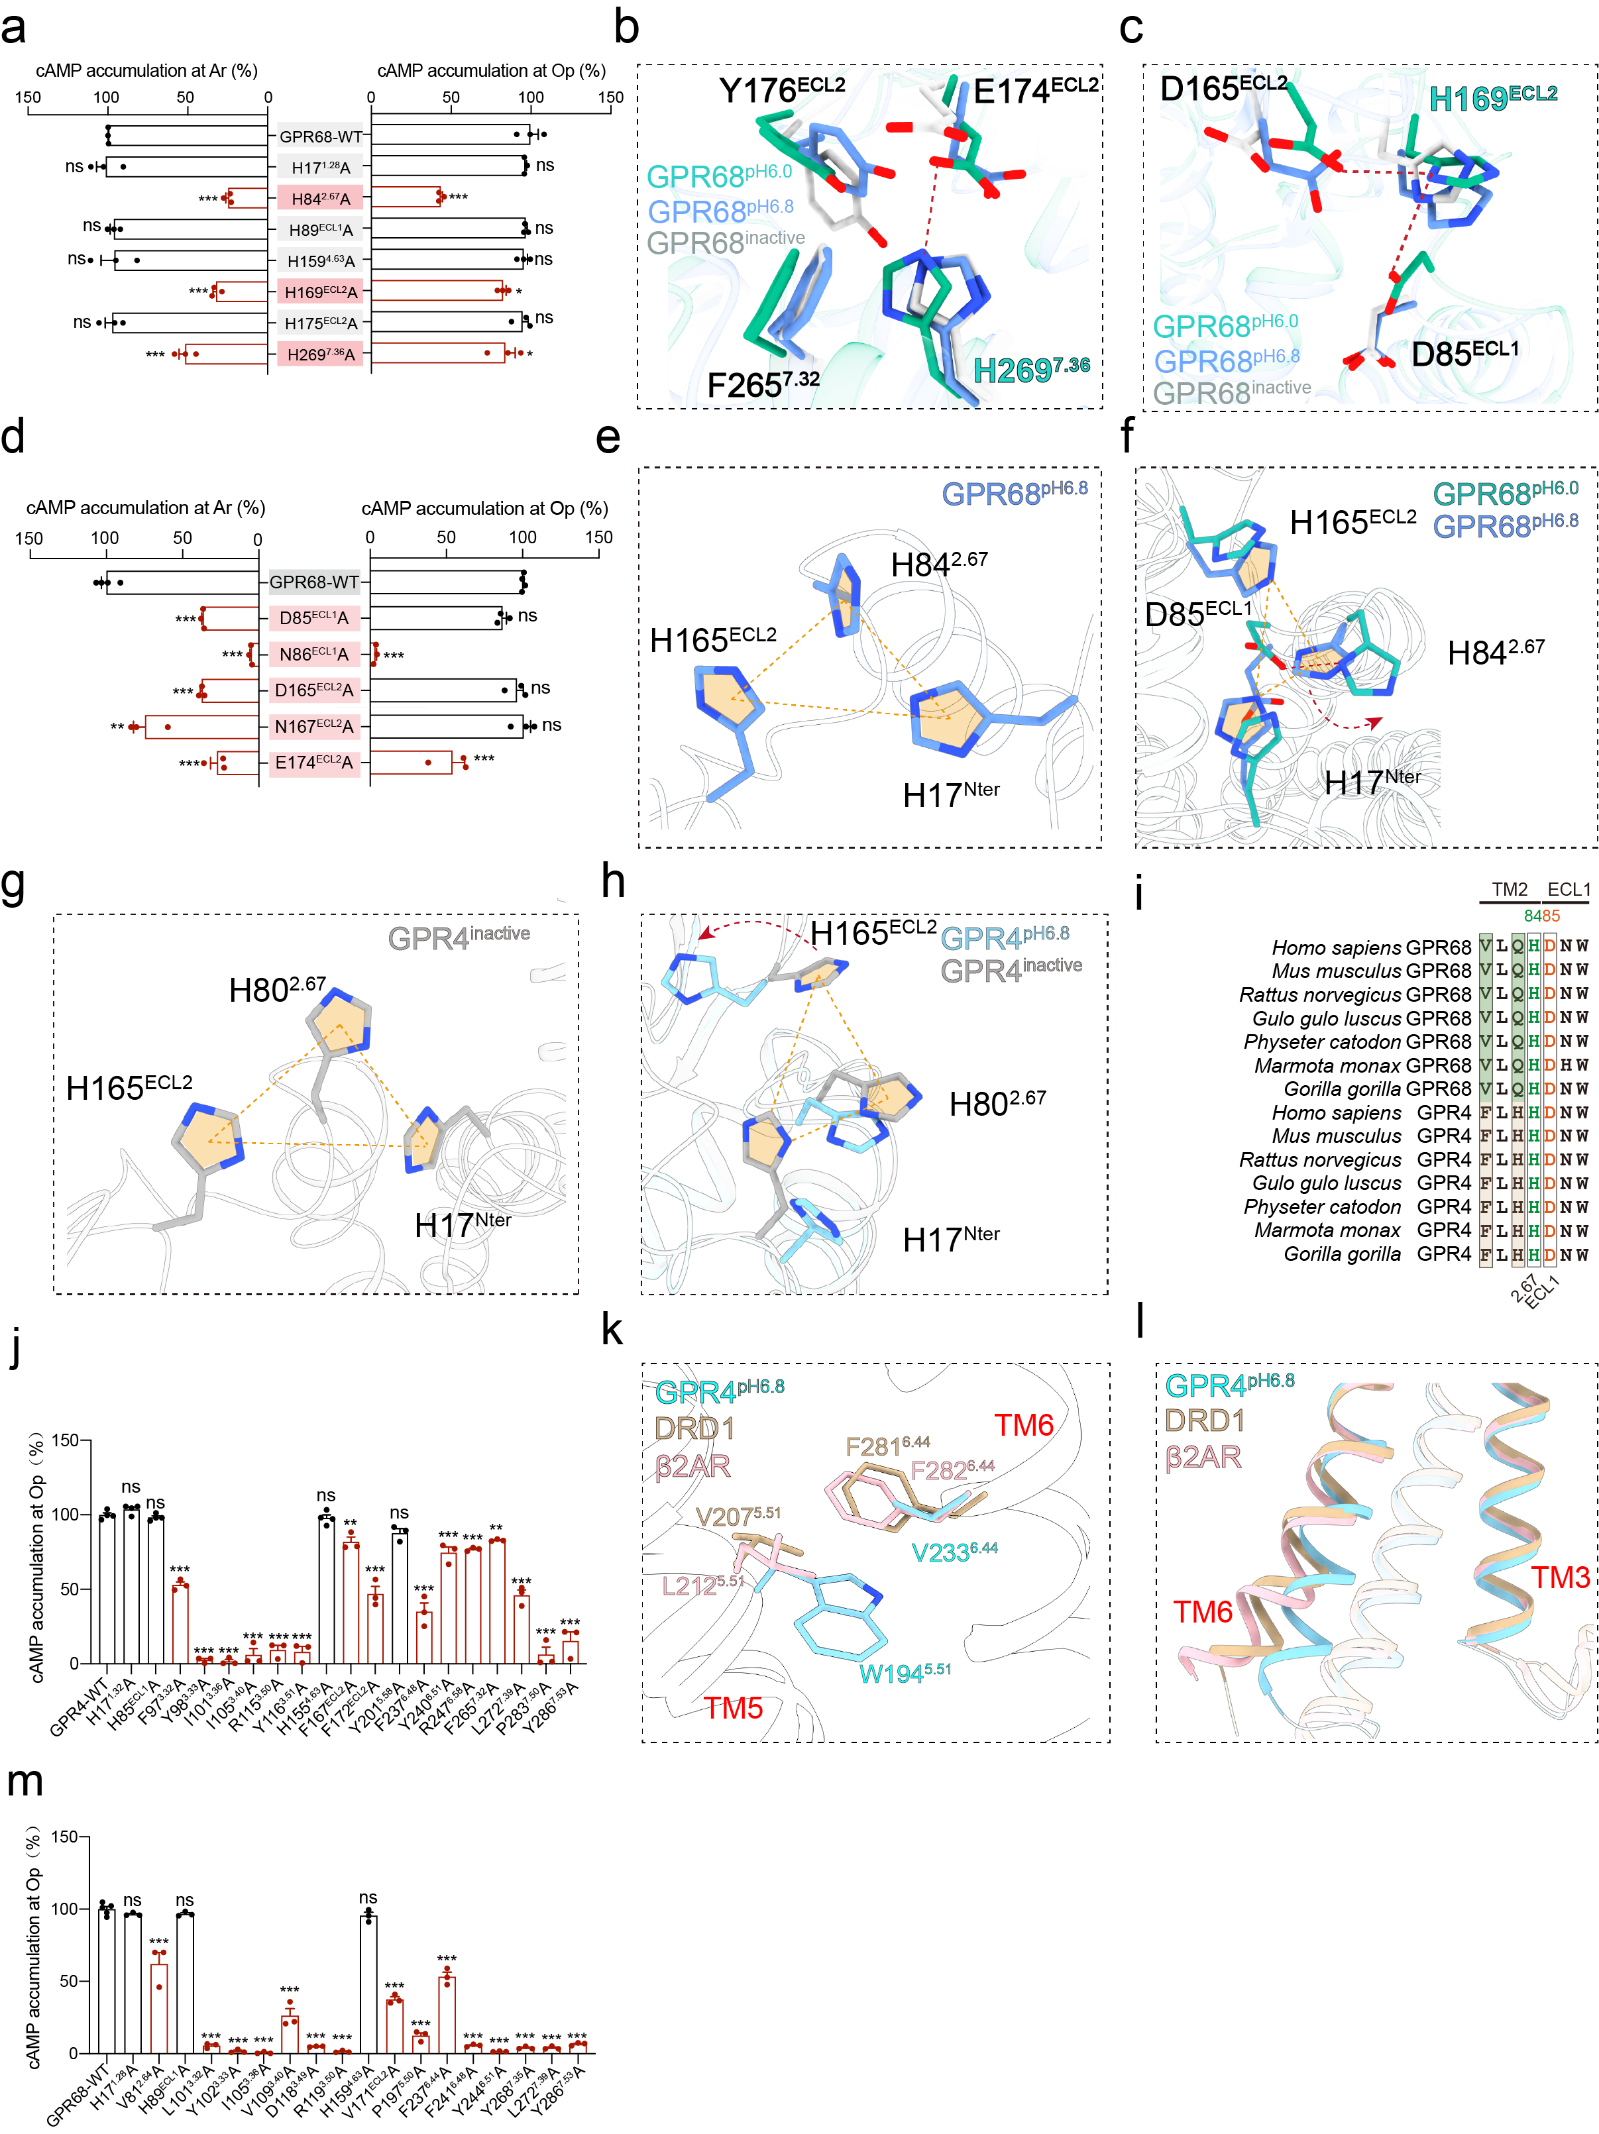


**Extended data Fig. 9| Common proton sensation mechanism shared by GPR68 and GPR4**

**a**, Effects of H171.28A, H842.67A, H89ECL1A, H1594.63A, H169ECL2A, H175ECL2A or H2697.36A mutations on GPR68-induced cAMP accumulation under Ar condition (left) or Op condition (right). Mutants resulting a significant difference are shown with a red background. Values are represented as mean ± SEM of 3 independent experiments (n = 3). *P < 0.05; ***P < 0.001; ns., not significant. All data were analyzed by two-sided one-way ANOVA with Turkey test (compared with GPR68 wild-type).

**b,** 3D representation of the detailed interactions between Y176ECL2, E174ECL2, F2657.32 and H2697.36 of GPR68 by comparison of GPR68pH6.0 and GPR68pH6.8/inactive structures. Hydrogen bond distances are shown as red dashed lines.

**c,** 3D representation of the detailed interactions between D85ECL1, D165ECL2 and H169ECL2 of GPR68 by comparison of GPR68pH6.0 and GPR68 pH6.8/inactive structures. Hydrogen bond distances are shown as red dashed lines.

**d,** Effects of D85ECL1A, N86ECL1A, D165ECL2A, N167ECL2A or E174ECL2A mutations on GPR68-induced cAMP accumulation under Ar condition (left) or Op condition (right). Mutants resulting a significant difference are shown with a red background. Values are represented as mean ± SEM of 3 independent experiments (n = 3). *P < 0.05; ***P < 0.001; ns., not significant. All data were analyzed by two-sided one-way ANOVA with Turkey test (compared with wild-type GPR68).

**e,** 3D representation of the detailed interactions between H17N-ter, H842.67, H165ECL2 of GPR68 by comparison of GPR68pH6.0 and GPR68pH6.8 structures, packing with each other and constitute a triple H motif in GPR68pH6.8 structure.

**f,** 3D representation of the detailed interactions between H17N-ter, H842.67, D85ECL1 and H165ECL2 of GPR68 by comparison of GPR68pH6.0 and GPR68pH6.8 structures. Protonation of the H842.67 in GPR68pH6.0 structure enabled the formation of potential H-bonds of H842.67 with the D85ECL1. Hydrogen bond distances are shown as red dashed lines.

**g,** 3D representation of the detailed interactions between H17N-ter, H802.67 and H165ECL2 of GPR4 by comparison of GPR4pH6.8 and GPR4inactive structures, packing with each other and constitute a triple H motif in GPR4inactive structure.

**h,** 3D representation of the detailed interactions between H17N-ter, H802.67 and H165ECL2 of GPR4 by comparison of GPR4pH6.8 and GPR4inactive structures, packing with each other and constitute a triple H motif in GPR4inactive structure, but the rotation of H165ECL2 from GPR4pH6.8 disrupted this hydrophobic packing.

**i,** Sequence alignment of H842.67 and D85ECL1 in the extracellular regions of GPR68 and H802.67 and D81ECL1 GPR4 from different species.

**j,** Effects of key residue mutations in the activation propagation pathway of GPR4 on cAMP accumulation at pH values ranging from 6.8 to 7.2 (Op). Values are represented as mean ± SEM of 3 independent experiments (n = 3). **P < 0.01; ***P < 0.001; ns., not significant. All data were analyzed by two-sided one-way ANOVA with Turkey test (compared with GPR4 wild-type).

**k,** Superimpositions of the residues L/V/W5.51 and F/V6.44 between the active GPR4pH 6.8 (blue) structure, active DRD11(PDB 7CKY) structure (yellow) and active β2AR2 (PDB 3SN6) structure (pink).

**l,** Structural representation and comparisons between the TMD of GPR4pH 6.8 (blue), DRD1 (yellow) and β2AR (pink), note that, compared with either DRD1 or β2AR, the separation between the TM3 and TM6 of GPR4 is significantly smaller.

**m,** Effects of key residue mutations in the activation propagation pathway of GPR68 on cAMP accumulation at pH values ranging from 5.4 to 6.0 (Op). Values are represented as mean ± SEM of 3 independent experiments (n = 3). ***P < 0.001; ns., not significant. All data were analyzed by two-sided one-way ANOVA with Turkey test (compared with GPR68 wild-type).

**Extended data Fig. 10**

**
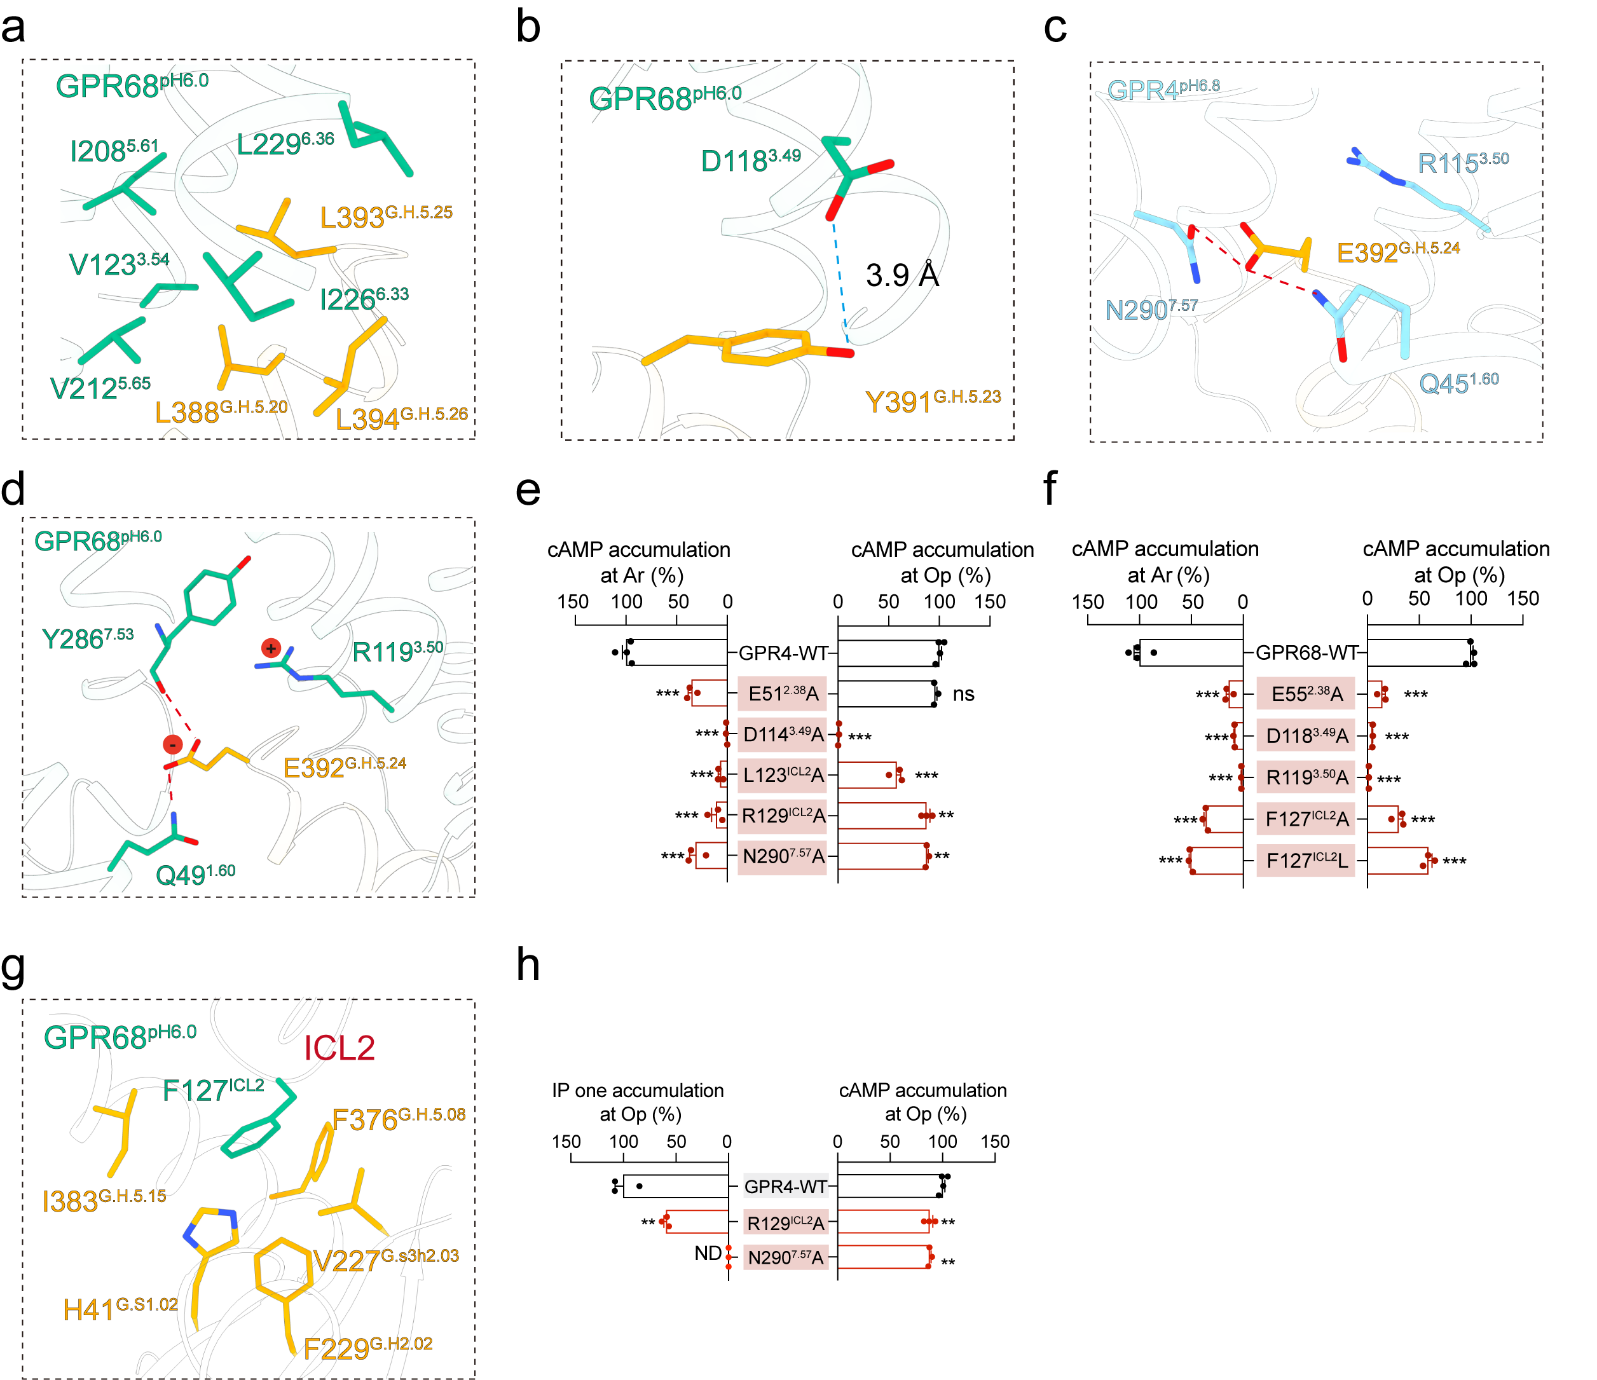
**

**Extended data Fig.10 | The mechanism of Gs/Gq coupling by GPR4/GPR68**

**a,** 3D representation of the detailed interactions of V1233.54, I2085.61, V2125.65 and L2296.36 in GPR68 and L388G.H5.20, L394G.H5.26 and L393G.H5.25 in Gαs.

**b,** 3D representation of the detailed interactions between D1183.49 of GPR68pH6.0 and Y391G.H.5.23.

**c,** 3D representation of the detailed interactions between E392G.H5.24 of the α5 helix of Gαs and R1153.50, N2907.57, Q451.60 of GPR4 in the GPR4pH6.8-Gs complex. Hydrogen bond distances are shown as red dashed lines. The E392 G.H5.24 of Gαs formed charge-charge interactions with R1153.50 of GPR4.

**d,** 3D representation of the detailed interactions between E392G.H5.24 of the α5 helix of Gαs and R1193.50, Y2867.53, Q491.60 of GPR68 in the GPR68pH6.0-Gs complex structure. Hydrogen bond distances are shown as red dashed lines. The E392 G.H5.24 of Gαs formed charge-charge interactions with R1193.50 of GPR68.

**e,** Effects of E512.38A, D1143.49A, L123ICL2A, R129ICL2A or N2907.57A mutations on GPR4-induced cAMP accumulation under Ar condition (left) or Op condition (right). Mutants resulting a significant difference are shown with a red background. Values are represented as mean ± SEM of 3 independent experiments (n = 3). **P < 0.01; ***P < 0.001; ns., not significant. All data were analyzed by two-sided one-way ANOVA with Turkey test (compared with GPR4 wild-type).

**f,** Effects of E552.38A, D1183.49A, R1193.50A, F127ICL2A or F127ICL2L mutations on GPR68-induced cAMP accumulation under Ar condition (left) or Op condition (right). Mutants resulting a significant difference are shown with a red background. Values are represented as mean ± SEM of 3 independent experiments (n = 3). ***P < 0.001; ns., not significant. All data were analyzed by two-sided one-way ANOVA with Turkey test (compared with GPR68 wild-type).

**g,** 3D representation illustrating the detailed interactions of F127 ICL2 in GPR68 and H41G.S1.02, V227G.S3.01, F376G.H5.15 and I383G.H5.15 in Gαs.

**h,** Effects of R129ICL2A or N2907.57A mutations on GPR4-induced IP one accumulation or cAMP accumulation under Op condition. Values are represented as mean ± SEM of 3 independent experiments (n = 3). **P < 0.01; ns., not significant. All data were analyzed by two-sided one-way ANOVA with Turkey test (compared with GPR4 wild-type).

**Extended data Table 1.** **Cryo-EM data collection, refinement and validation statistics**

| **complexes** | **GPR4-Gs** | | | | **GPR4-Gq** | **GPR68-Gs** | |
| --- | --- | --- | --- | --- | --- | --- | --- |
| **pH** | **7.6** | **7.2** | **6.8** | **6.0** | **6.5** | **6.8** | **6.0** |
| **Data collection and processing** | | | | | | | |
| Magnification | 130,000 | 105,000 | 130,000 | 130,000 | 105,000 | 130,000 | 165,000 |
| Voltage (kV) | 300 | 300 | 300 | 300 | 300 | 300 | 300 |
| Electron exposure (e–/Å2) | 60 | 60 | 60 | 60 | 60 | 60 | 60 |
| Defocus range (μm) | -1.2 ~ -1.8 | -1.0 ~ -2.0 | -1.0 ~ -2.0 | -1.0 ~ -1.5 | -1.0 ~ -2.0 | -1.0 ~ -2.0 | -1.2 ~ -1.8 |
| Pixel size (Å) | 0.95 | 0.82 | 1.052 | 1.076 | 0.82 | 0.92 | 0.74 |
| Symmetry imposed | C1 | C1 | C1 | C1 | C1 | C1 | C1 |
| Initial particle images (no.) | 2,073,757 | 4,892,037 | 3,113,317 | 2,099,466 | 2,725,625 | 4,519,710 | 1,351,517 |
| Final particle images (no.) | 467,832 | 555,673 | 282,290 | 216,224 | 1,061,791 | 544,141 | 134,460 |
| Map resolution (Å) | 2.76 | 2.81 | 3.20 | 3.00 | 2.90 | 2.64 | 3.30 |
| FSC threshold | 0.143 | 0.143 | 0.143 | 0.143 | 0.143 | 0.143 | 0.143 |
| Map resolution range (Å) | 2.5-5.0 | 2.5-5.0 | 2.5-5.0 | 2.5-5.0 | 2.5-5.0 | 2.5-5.0 | 2.5-5.0 |
| **Refinement** | | | | | | | |
| Initial model used (PDB code) | 8IW4 | 8IW4 | 8IW4 | 8IW4 | 6WHA | 8IW4 | 8IW4 |
| Model resolution (Å) | 2.8 | 2.9 | 3.4 | 2.7 | 3.1 | 3.0 | 3.0 |
| FSC threshold | 0.5 | 0.5 | 0.5 | 0.5 | 0.5 | 0.5 | 0.5 |
| Model resolution range (Å) | 2.5-5.0 | 2.5-5.0 | 2.5-5.0 | 2.5-5.0 | 2.5-5.0 | 2.5-5.0 | 2.5-5.0 |
| Map sharpening *B* factor (Å2) |  |  |  |  |  |  |  |
| Model composition | | | | | | | |
| Non-hydrogen atoms | 8277 | 8527 | 8580 | 8777 | 8377 | 8541 | 6522 |
| Protein residues | 1124 | 1148 | 1155 | 1157 | 1145 | 1140 | 910 |
| Ligands | 0 | 0 | 0 | 0 | 0 | 0 | 0 |
| B factors (Å2) | | | | | | | |
| Protein | 58.88 | 53.39 | 77.70 | 54.04 | 72.65 | 59.10 | 75.12 |
| Ligand | - | - | - | - | - | - | - |
| R.m.s. deviations | | | | | | | |
| Bond lengths (Å) | 0.007 | 0.005 | 0.007 | 0.018 | 0.003 | 0.005 | 0.007 |
| Bond angles (°) | 0.739 | 0.655 | 0.756 | 0.973 | 0.586 | 0.637 | 0.723 |
| Validation | | | | | | | |
| MolProbity score | 1.65 | 1.78 | 1.84 | 1.56 | 1.79 | 1.81 | 1.71 |
| Clashscore | 5.49 | 8.20 | 7.66 | 4.85 | 9.70 | 10.00 | 5.82 |
| Poor rotamers (%) | 0.00 | 0.00 | 0.00 | 0.00 | 0.00 | 0.00 | 0.00 |
| Ramachandran plot | | | | | | | |
| Favored (%) | 94.93 | 95.21 | 93.68 | 95.54 | 95.93 | 95.81 | 94.22 |
| Allowed (%) | 5.07 | 4.79 | 6.32 | 4.46 | 4.07 | 4.19 | 5.78 |
| Disallowed (%) | 0 | 0 | 0 | 0 | 0 | 0 | 0 |

1 Xiao, P. *et al.* Ligand recognition and allosteric regulation of DRD1-Gs signaling complexes. *Cell* **184**, 943-956 e918, doi:10.1016/j.cell.2021.01.028 (2021).

2 Rasmussen, S. G. *et al.* Crystal structure of the beta2 adrenergic receptor-Gs protein complex. *Nature* **477**, 549-555, doi:10.1038/nature10361 (2011).
